# Supplementary material for: The effect of substituents on triply bonded boronantimony molecules: a theoretical approach
Source: Royal Society of Chemistry journal article supplement (doi:10.1039/c7cp00421d), 2017-01-01
Supplement: c7cp00421d1.pdf [file c7cp00421d1.pdf]

# Supplementary Materials

## The Effect of Substituents on the Triply Bonded Boron $\equiv$ Antimony Molecules: A Theoretical Approach

Jia-Syun Lu,<sup>1</sup> Ming-Chung Yang,<sup>1</sup> and Ming-Der Su<sup>1,2\*</sup>

<sup>1</sup>Department of Applied Chemistry, National Chiayi University, Chiayi 60004,  
Taiwan

<sup>2</sup>Department of Medicinal and Applied Chemistry, Kaohsiung Medical University,  
Kaohsiung 80708, Taiwan

\*E-mail: midesu@mail.ncyu.edu.tw

### Table of Contents:

|                                |    |
|--------------------------------|----|
| Theoretical Methods            | S2 |
| References                     | S3 |
| Figure S1 ( $R' = SiPrDis_2$ ) | S4 |
| Figure S2 ( $R' = NHC$ )       | S5 |
| Cartesian Coordinates          | S6 |

## Theoretical Methods

Using the Gaussian 09 program package,<sup>1</sup> all geometries are fully optimized using hybrid density functional theory at the M06-2X,<sup>2</sup> B3LYP,<sup>3,4</sup> and B3PW91<sup>4,5</sup> levels, in conjunction with the Def2-TZVP<sup>6</sup> and LANL2DZ+dp<sup>7</sup> basis sets. These DFT calculations are signified as M06-2X/Def2-TZVP, B3PW91/Def2-TZVP and B3LYP/LANL2DZ+dp, respectively. In order to confirm that the reactants and products have no imaginary frequencies and that the transition states possess only one imaginary frequency, frequency calculations were performed for all structures. Thermodynamic corrections to 298 K, heat capacity corrections and entropy corrections ( $\Delta S$ ) are applied to the three levels of DFT. The relative free energy ( $\Delta G$ ) at 298 K is also computed at the same levels of theory.

Next,  $\text{SiMe}(\text{Si}t\text{Bu}_3)_2\text{-B}\equiv\text{Sb-SiMe}(\text{Si}t\text{Bu}_3)_2$ ,  $\text{Si}i\text{PrDis}_2\text{-B}\equiv\text{Sb-Si}i\text{PrDis}_2$ , and  $\text{Tbt-B}\equiv\text{Sb-Tbt}$  are the model reactants for this study. Because the Hartree-Fock level of theory cannot accurately describe the entire energy surface, even qualitatively, these stationary points are further computed at the B3LYP/LANL2DZ+dp method. Because of the limitations of the available memory size and CPU time, frequencies are not computed at the B3LYP/LANL2DZ+dp level of theory for the triply bonded  $\text{R}'\text{B}\equiv\text{SbR}'$  systems that have bulky ligands ( $\text{R}'$ ), so the zero-point energies and the Gibbs free energies that are derived using B3LYP/LANL2DZ+dp cannot be used for these systems.

## References:

- (1) Frisch, M. J.; Trucks, G. W.; Schlegel, H. B.; Scuseria, G. E.; Robb, M. A.; Cheeseman, J. R.; Scalmani, G.; Barone, V.; Mennucci, B.; Petersson, G. A.; Nakatsuji, H.; Caricato, M.; Li, X.; Hratchian, H. P.; Izmaylov, A. F.; Bloino, J.; Zheng, G.; Sonnenberg, J. L.; Hada, M.; Ehara, M.; Toyota, K.; Fukuda, R.; Hasegawa, J.; Ishida, M.; Nakajima, T.; Honda, Y.; Kitao, O.; Nakai, H.; Vreven, T.; Montgomery, Jr., J. A.; Peralta, J. E.; Ogliaro, F.; Bearpark, M.; Heyd, J. J.; Brothers, E.; Kudin, K. N.; Staroverov, V. N.; Keith, T.; Kobayashi, R.; Normand, J.; Raghavachari, K.; Rendell, A.; Burant, J. C.; Iyengar, S. S.; Tomasi, J.; Cossi, M.; Rega, N.; Millam, J. M.; Klene, M.; Knox, J. E.; Cross, J. B.; Bakken, V.; Adamo, C.; Jaramillo, J.; Gomperts, R.; Stratmann, R. E.; Yazyev, O.; Austin, A. J.; Cammi, R.; Pomelli, C.; Ochterski, J. W.; Martin, R. L.; Morokuma, K.; Zakrzewski, V. G.; Voth, G. A.; Salvador, P.; Dannenberg, J. J.; Dapprich, S.; Daniels, A. D.; Farkas, O.; Foresman, J. B.; Ortiz, J. V.; Cioslowski, J. and Fox, D. J. *Gaussian, Inc.*, Wallingford CT, 2013.
- (2) Zhao, Y.; Truhlar, D. G. *Acc. Chem. Res.* **2008**, *41*, 157-167.
- (3) (a) Becke, A. D. *Phys. Rev. A* **1988**, *38*, 3098-3100. (b) Becke, A. D. *J. Chem. Phys.* **1993**, *98*, 5648-5652.
- (4) Lee, C.; Yang, W.; Parr, R. G. *Phys. Rev. B* **1988**, *37*, 785-789.
- (5) Perdew, J. P.; Wang, Y. *Phys. Rev.* **1992**, *B45*, 13244-13249.
- (6) Weigend, F.; Ahlrichs, R. *Phys. Chem. Chem. Phys.* **2005**, *7*, 3297-3305.
- (7) (a) Dunning, T. H., Jr.; Hay, P. J. In *Modern Theoretical Chemistry*, Schaefer, H. F., III, Ed.; Plenum: New York, 1976; p1-28. (b) Hay, P. J.; Wadt, W. R. *J. Chem. Phys.* **1985**, *82*, 270-283. (c) Hay, P. J.; Wadt, W. R. *J. Chem. Phys.* **1985**, *82*, 284-298. (d) Hay, P. J.; Wadt, W. R. *J. Chem. Phys.* **1985**, *82*, 299-310. (e) Check, C. E.; Faust, T. O.; Bailey, J. M.; Wright, B. J.; Gilbert, T. M.; Sunderlin, L. S. *J. Phys. Chem. A* **2001**, *105*, 8111-8116.

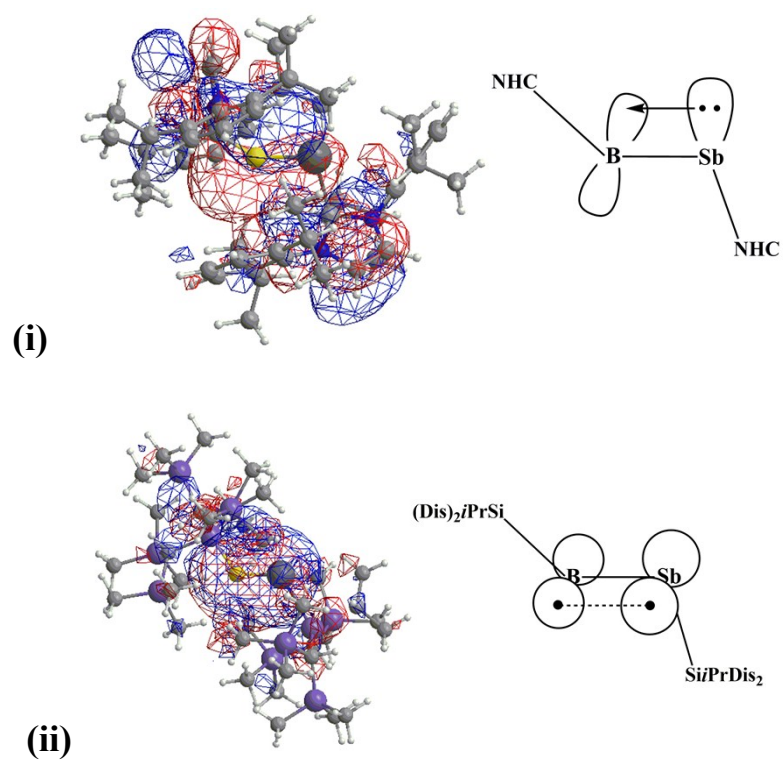

Figure S1: The natural  $B\equiv Sb$   $\pi$  bonding orbitals ((i) and (ii)) of  $(SiPrDis_2)B\equiv Sb(SiPrDis_2)$ . For comparison, also see Figure 1.

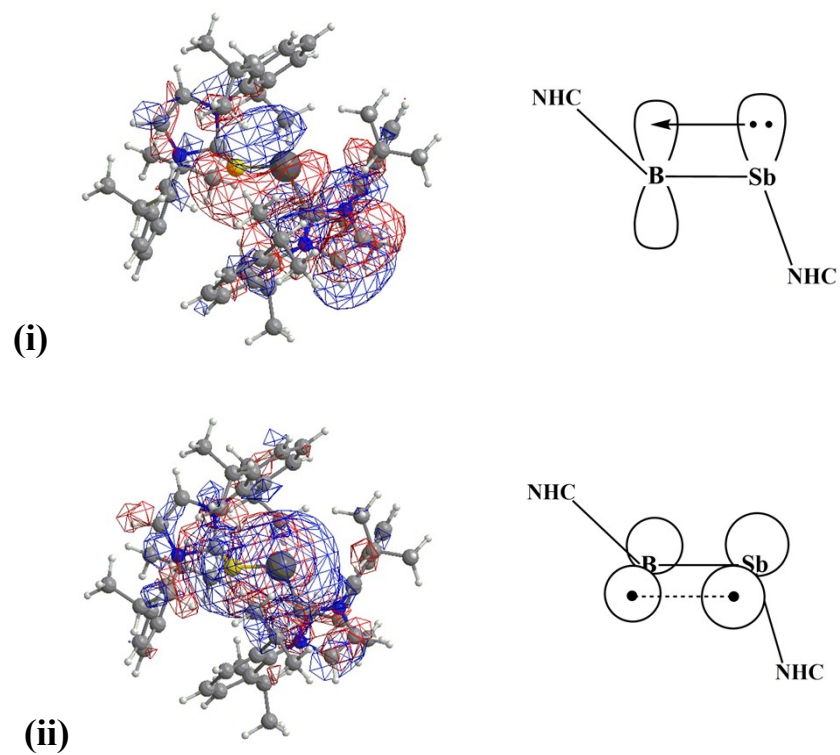

Figure S2: The natural  $B\equiv Sb$   $\pi$  bonding orbitals ((i) and (ii)) of  $((NHC)B\equiv Sb(NHC))$ . For comparison, also see Figure 1.

M06-2X/Def2-TZVP

F2B-Sb

---

| Atomic<br>Number | Coordinates (Angstroms) |           |           |
|------------------|-------------------------|-----------|-----------|
|                  | X                       | Y         | Z         |
| F                | 2.032954                | -1.130512 | -0.000245 |
| F                | 2.030400                | 1.131651  | -0.000245 |
| B                | 1.344402                | -0.000323 | 0.001159  |
| Sb               | -0.848866               | -0.000169 | -0.000027 |

---

F2B-Sb (TS1)

---

| Atomic<br>Number | Coordinates (Angstroms) |           |          |
|------------------|-------------------------|-----------|----------|
|                  | X                       | Y         | Z        |
| B                | -0.739213               | 1.246284  | 0.000000 |
| Sb               | 0.000000                | -0.701928 | 0.000000 |
| F                | 1.372228                | 0.793944  | 0.000000 |
| F                | -0.961554               | 2.491269  | 0.000000 |

---

F-B-Sb-F

---

| Atomic<br>Number | Coordinates (Angstroms) |           |           |
|------------------|-------------------------|-----------|-----------|
|                  | X                       | Y         | Z         |
| Sb               | 0.517058                | -0.307456 | -0.000002 |
| B                | -1.585916               | -0.018508 | 0.000060  |
| F                | 0.793375                | 1.613389  | 0.000000  |
| F                | -2.842304               | 0.139143  | -0.000021 |

---

B-SbF2 (TS2)

---

| Atomic<br>Number | Coordinates (Angstroms) |   |   |
|------------------|-------------------------|---|---|
|                  | X                       | Y | Z |

---

|    |           |           |           |
|----|-----------|-----------|-----------|
| B  | 1.526160  | 0.747606  | 1.291248  |
| Sb | -0.210807 | -0.356275 | 0.050535  |
| F  | -1.072879 | 1.338372  | -0.156645 |
| F  | 1.419583  | 0.265181  | -0.847079 |

-----  
 -----  
 B-SbF2

| Atomic<br>Number | Coordinates (Angstroms) |           |           |
|------------------|-------------------------|-----------|-----------|
|                  | X                       | Y         | Z         |
| Sb               | -0.011314               | -0.306071 | 0.240091  |
| B                | 0.101375                | 2.058396  | 0.834664  |
| F                | -1.406524               | 0.344293  | -0.903420 |
| F                | 1.414316                | 0.246555  | -0.920797 |

-----  
 -----  
 (OH)2B-Sb

| Atomic<br>Number | Coordinates (Angstroms) |           |           |
|------------------|-------------------------|-----------|-----------|
|                  | X                       | Y         | Z         |
| B                | -1.344079               | -0.002798 | -0.001459 |
| Sb               | 0.866179                | -0.001504 | 0.000105  |
| O                | -1.985604               | -1.207825 | 0.001831  |
| H                | -2.948174               | -1.179107 | -0.013901 |
| O                | -1.962086               | 1.215399  | -0.002967 |
| H                | -2.925055               | 1.209196  | 0.024924  |

-----  
 -----  
 (OH)2B-Sb (TS1)

| Atomic<br>Number | Coordinates (Angstroms) |           |           |
|------------------|-------------------------|-----------|-----------|
|                  | X                       | Y         | Z         |
| B                | -1.366688               | -0.446961 | 0.054321  |
| Sb               | 0.688001                | -0.176992 | -0.003397 |
| O                | -0.412092               | 1.589283  | -0.099040 |
| H                | -0.456433               | 2.014315  | 0.761990  |
| O                | -2.670747               | -0.418625 | 0.080286  |

H -3.135457 -0.118177 -0.710293

---

---

HO-B-Sb-OH

---

---

| Atomic<br>Number | Coordinates (Angstroms) |           |           |
|------------------|-------------------------|-----------|-----------|
|                  | X                       | Y         | Z         |
| O                | -0.856110               | 1.641104  | -0.117060 |
| H                | -0.989894               | 2.034612  | 0.747571  |
| O                | 2.859722                | 0.169535  | -0.092600 |
| H                | 3.342745                | 0.335932  | 0.727409  |
| Sb               | -0.515138               | -0.326468 | 0.006501  |
| B                | 1.578052                | -0.041154 | -0.025853 |

---

---

B-Sb(OH)<sub>2</sub> (TS2)

---

---

| Atomic<br>Number | Coordinates (Angstroms) |           |           |
|------------------|-------------------------|-----------|-----------|
|                  | X                       | Y         | Z         |
| B                | -0.773743               | 1.365700  | 1.463821  |
| Sb               | 0.105433                | -0.388652 | 0.102515  |
| O                | -1.506316               | 0.401884  | -0.745530 |
| H                | -1.648515               | 0.265557  | -1.685734 |
| O                | 1.385858                | 0.954836  | -0.551908 |
| H                | 1.103787                | 1.873447  | -0.482147 |

---

---

B-Sb(OH)<sub>2</sub>

---

---

| Atomic<br>Number | Coordinates (Angstroms) |           |           |
|------------------|-------------------------|-----------|-----------|
|                  | X                       | Y         | Z         |
| O                | -1.507214               | 0.324625  | 0.882610  |
| H                | -1.896401               | -0.359183 | 1.437491  |
| O                | 1.505818                | 0.307909  | 0.887564  |
| H                | 1.883707                | -0.378152 | 1.447631  |
| Sb               | -0.001529               | -0.290281 | -0.265536 |
| B                | 0.020372                | 2.096282  | -0.700839 |



---

---

H2B-Sb

---

| Atomic<br>Number | Coordinates (Angstroms) |           |           |
|------------------|-------------------------|-----------|-----------|
|                  | X                       | Y         | Z         |
| H                | 2.395082                | -1.032533 | 0.000440  |
| H                | 2.385077                | 1.037831  | 0.000437  |
| B                | 1.799659                | -0.000361 | -0.000225 |
| Sb               | -0.270166               | -0.000068 | 0.000005  |

---

---

---

H2B-Sb (TS1)

---

| Atomic<br>Number | Coordinates (Angstroms) |           |           |
|------------------|-------------------------|-----------|-----------|
|                  | X                       | Y         | Z         |
| B                | -1.941762               | -0.070761 | -0.179320 |
| Sb               | 0.230160                | -0.017026 | -0.006899 |
| H                | -0.592953               | 1.503775  | 0.158036  |
| H                | -1.436402               | -0.281620 | 1.090425  |

---

---

---

H-B-Sb-H

---

| Atomic<br>Number | Coordinates (Angstroms) |           |          |
|------------------|-------------------------|-----------|----------|
|                  | X                       | Y         | Z        |
| B                | 0.029832                | 2.028230  | 0.000000 |
| Sb               | 0.029832                | -0.261770 | 0.000000 |
| H                | -1.672375               | -0.001250 | 0.000000 |
| H                | 0.001757                | 3.210382  | 0.000000 |

---

---

---

B-SbH2 (TS2)

---

| Atomic<br>Number | Coordinates (Angstroms) |   |   |
|------------------|-------------------------|---|---|
|                  | X                       | Y | Z |

---

|    |           |           |           |
|----|-----------|-----------|-----------|
| B  | -2.041270 | -0.045948 | -0.148602 |
| H  | -0.381033 | 1.581674  | 0.212888  |
| Sb | 0.229422  | -0.020026 | -0.012348 |
| H  | -1.113136 | -0.330615 | 1.159868  |

-----  
 -----  
 B-SbH2

| Atomic<br>Number | Coordinates (Angstroms) |           |           |
|------------------|-------------------------|-----------|-----------|
|                  | X                       | Y         | Z         |
| B                | -2.140214               | -0.000461 | -0.047003 |
| Sb               | 0.211079                | 0.000058  | -0.039969 |
| H                | -0.034257               | 1.227006  | 1.137032  |
| H                | -0.029709               | -1.227682 | 1.136397  |

-----  
 -----  
 (CH3)2B-Sb

| Atomic<br>Number | Coordinates (Angstroms) |           |           |
|------------------|-------------------------|-----------|-----------|
|                  | X                       | Y         | Z         |
| C                | 2.048177                | 1.380774  | -0.000069 |
| H                | 2.700955                | 1.427005  | 0.883914  |
| H                | 2.712219                | 1.423051  | -0.875661 |
| H                | 1.438773                | 2.291168  | -0.005757 |
| C                | 2.108963                | -1.351498 | 0.000081  |
| H                | 2.767827                | -1.367487 | 0.879551  |
| H                | 2.770522                | -1.367357 | -0.877348 |
| H                | 1.538927                | -2.285580 | -0.001004 |
| B                | 1.272318                | -0.004592 | -0.000913 |
| Sb               | -0.886934               | -0.005363 | 0.000016  |

-----  
 -----  
 (CH3)2B-Sb (TS1)

| Atomic<br>Number | Coordinates (Angstroms) |           |           |
|------------------|-------------------------|-----------|-----------|
|                  | X                       | Y         | Z         |
| B                | -1.385140               | -0.432391 | -0.000227 |
| Sb               | 0.702615                | -0.258624 | 0.000043  |

|   |           |           |           |
|---|-----------|-----------|-----------|
| C | -0.132920 | 1.921642  | 0.000579  |
| H | 0.240911  | 2.400130  | 0.901093  |
| H | 0.262369  | 2.397468  | -0.892362 |
| H | -1.219982 | 1.981568  | -0.014740 |
| C | -2.914443 | -0.325970 | 0.000042  |
| H | -3.300122 | 0.173431  | -0.891151 |
| H | -3.307823 | -1.348676 | 0.000785  |
| H | -3.298840 | 0.173827  | 0.891580  |

H3C-B-Sb-CH3

| Atomic<br>Number | Coordinates (Angstroms) |           |           |
|------------------|-------------------------|-----------|-----------|
|                  | X                       | Y         | Z         |
| B                | -1.507195               | 0.106807  | -0.009050 |
| Sb               | 0.486313                | -0.387950 | 0.000299  |
| C                | -3.019513               | 0.323567  | 0.002224  |
| H                | -3.370870               | 0.838993  | 0.899789  |
| H                | -3.384429               | 0.844483  | -0.886875 |
| H                | -3.474312               | -0.676993 | 0.001966  |
| C                | 1.185028                | 1.701276  | 0.000511  |
| H                | 2.266979                | 1.654172  | -0.112992 |
| H                | 0.942108                | 2.184489  | 0.943515  |
| H                | 0.761431                | 2.257200  | -0.831825 |

B-Sb(CH3)2 (TS2)

| Atomic<br>Number | Coordinates (Angstroms) |           |           |
|------------------|-------------------------|-----------|-----------|
|                  | X                       | Y         | Z         |
| B                | 1.302181                | 0.406257  | 1.350297  |
| Sb               | -0.291963               | -0.419385 | -0.015813 |
| C                | -0.974741               | 1.639536  | -0.071543 |
| H                | -0.899973               | 2.021119  | -1.087414 |
| H                | -2.016916               | 1.661627  | 0.243784  |
| H                | -0.383741               | 2.259329  | 0.604562  |
| C                | 1.853249                | 0.373142  | -0.502506 |
| H                | 2.729163                | -0.217505 | -0.233748 |

|   |          |          |           |
|---|----------|----------|-----------|
| H | 1.599535 | 0.119463 | -1.546800 |
| H | 2.080115 | 1.437239 | -0.481118 |

B-Sb(CH<sub>3</sub>)<sub>2</sub>

| Atomic<br>Number | Coordinates (Angstroms) |           |           |
|------------------|-------------------------|-----------|-----------|
|                  | X                       | Y         | Z         |
| C                | 1.585679                | 1.023531  | -0.371915 |
| H                | 1.426213                | 1.474979  | -1.349561 |
| H                | 1.581273                | 1.815666  | 0.380992  |
| H                | 2.551023                | 0.522348  | -0.355727 |
| C                | -1.585891               | 1.023321  | -0.372348 |
| H                | -1.460067               | 1.435060  | -1.372026 |
| H                | -1.546221               | 1.842955  | 0.348887  |
| H                | -2.553524               | 0.531578  | -0.301520 |
| Sb               | 0.000131                | -0.452092 | -0.055321 |
| B                | -0.000823               | 0.630596  | 1.987180  |

(SiH<sub>3</sub>)<sub>2</sub>B-Sb

| Atomic<br>Number | Coordinates (Angstroms) |           |           |
|------------------|-------------------------|-----------|-----------|
|                  | X                       | Y         | Z         |
| B                | -0.743809               | -0.000145 | 0.000152  |
| Sb               | 1.297793                | -0.000933 | -0.000001 |
| Si               | -1.787395               | -1.725470 | -0.000003 |
| H                | -2.657133               | -1.785489 | -1.204256 |
| H                | -0.939514               | -2.946442 | -0.000494 |
| H                | -2.656111               | -1.785253 | 1.205109  |
| Si               | -1.782657               | 1.728170  | -0.000008 |
| H                | -2.652699               | 1.790711  | 1.203961  |
| H                | -0.931577               | 2.946929  | 0.000619  |
| H                | -2.650626               | 1.790034  | -1.205477 |

(SiH<sub>3</sub>)<sub>2</sub>B-Sb (TS1)

| Atomic<br>Number | Coordinates (Angstroms) |           |           |
|------------------|-------------------------|-----------|-----------|
|                  | X                       | Y         | Z         |
| B                | 1.222623                | -0.020890 | 0.008838  |
| Sb               | -0.671751               | -0.730440 | -0.000223 |
| H                | -3.039605               | 1.523319  | 0.105210  |
| Si               | -1.568772               | 1.698673  | 0.000089  |
| H                | -1.266745               | 2.410150  | -1.263104 |
| H                | -1.104037               | 2.495118  | 1.155763  |
| Si               | 3.179273                | 0.402072  | 0.000045  |
| H                | 3.829623                | -0.316313 | -1.125808 |
| H                | 3.811965                | -0.029876 | 1.269052  |
| H                | 3.367988                | 1.864041  | -0.175803 |

H3Si-B-Sb-SiH3

| Atomic<br>Number | Coordinates (Angstroms) |           |           |
|------------------|-------------------------|-----------|-----------|
|                  | X                       | Y         | Z         |
| B                | -0.882708               | -0.367006 | -0.013552 |
| Sb               | 1.114259                | -0.445274 | 0.000475  |
| Si               | -0.098671               | 1.910027  | 0.000304  |
| H                | 0.387608                | 2.607373  | -1.205145 |
| H                | -1.580197               | 1.997233  | -0.009693 |
| H                | 0.369027                | 2.597473  | 1.218811  |
| Si               | -2.864874               | -0.545089 | 0.000718  |
| H                | -3.452929               | 0.120421  | -1.182167 |
| H                | -3.221660               | -1.979745 | -0.004921 |
| H                | -3.425905               | 0.092121  | 1.212331  |

B-Sb(SiH3) (TS2)

| Atomic<br>Number | Coordinates (Angstroms) |           |           |
|------------------|-------------------------|-----------|-----------|
|                  | X                       | Y         | Z         |
| B                | -0.460122               | 0.315704  | 1.810528  |
| Sb               | 0.089011                | -0.784903 | -0.070052 |
| H                | 2.017753                | 1.611903  | -1.494989 |

|    |           |          |           |
|----|-----------|----------|-----------|
| Si | 1.815566  | 1.173776 | -0.090431 |
| H  | 3.085886  | 0.627263 | 0.448417  |
| H  | 1.377575  | 2.332051 | 0.728630  |
| Si | -1.938939 | 0.979360 | -0.206200 |
| H  | -3.051430 | 0.658177 | 0.716933  |
| H  | -2.381893 | 0.671291 | -1.592081 |
| H  | -1.559645 | 2.406950 | -0.134068 |

-----  
 -----  
 B-Sb(SiH3)2  
 -----

| Atomic<br>Number | Coordinates (Angstroms) |           |           |
|------------------|-------------------------|-----------|-----------|
|                  | X                       | Y         | Z         |
| H                | -1.438492               | 2.026532  | -1.242176 |
| H                | -3.083915               | 0.478806  | -0.343557 |
| H                | -1.764525               | 1.850895  | 1.136230  |
| H                | 1.494242                | 1.972131  | -1.298068 |
| H                | 3.095182                | 0.477769  | -0.246280 |
| H                | 1.697463                | 1.908556  | 1.099184  |
| Si               | -1.760072               | 1.096879  | -0.142249 |
| Si               | 1.760614                | 1.096538  | -0.141209 |
| B                | -0.002905               | 0.141618  | 2.011288  |
| Sb               | 0.000137                | -0.786875 | -0.101831 |

-----  
 -----  
 B3PW91/Def2-TZVP  
 -----

F2B-Sb  
 -----

| Atomic<br>Number | Coordinates (Angstroms) |           |           |
|------------------|-------------------------|-----------|-----------|
|                  | X                       | Y         | Z         |
| F                | 2.031699                | -1.135596 | -0.000006 |
| F                | 2.031565                | 1.135654  | -0.000006 |
| B                | 1.342151                | -0.000013 | 0.000029  |
| Sb               | -0.848630               | -0.000009 | -0.000001 |

-----  
 -----

## F2B-Sb (TS1)

---

| Atomic<br>Number | Coordinates (Angstroms) |           |          |
|------------------|-------------------------|-----------|----------|
|                  | X                       | Y         | Z        |
| B                | -0.735271               | -1.240084 | 0.000000 |
| Sb               | 0.000000                | 0.700469  | 0.000000 |
| F                | 1.396117                | -0.794098 | 0.000000 |
| F                | -0.987634               | -2.486292 | 0.000000 |

---

## F-B-Sb-F

---

| Atomic<br>Number | Coordinates (Angstroms) |           |           |
|------------------|-------------------------|-----------|-----------|
|                  | X                       | Y         | Z         |
| Sb               | 0.517924                | -0.308227 | -0.000002 |
| B                | -1.579819               | -0.030368 | 0.000063  |
| F                | 0.783710                | 1.624416  | 0.000000  |
| F                | -2.840934               | 0.139077  | -0.000022 |

---

## B-SbF2 (TS2)

---

| Atomic<br>Number | Coordinates (Angstroms) |           |           |
|------------------|-------------------------|-----------|-----------|
|                  | X                       | Y         | Z         |
| B                | -1.275998               | 1.184609  | 1.325741  |
| Sb               | 0.146331                | -0.354638 | 0.110742  |
| F                | 1.248247                | 1.140104  | -0.389343 |
| F                | -1.368567               | 0.211395  | -0.974720 |

---

## B-SbF2

---

| Atomic<br>Number | Coordinates (Angstroms) |           |           |
|------------------|-------------------------|-----------|-----------|
|                  | X                       | Y         | Z         |
| Sb               | -0.006508               | -0.318488 | -0.227963 |
| B                | 0.059060                | 2.027114  | -0.905828 |

---

|   |           |          |          |
|---|-----------|----------|----------|
| F | 1.425390  | 0.311322 | 0.903721 |
| F | -1.421325 | 0.367271 | 0.891309 |

---

---

(OH)<sub>2</sub>B-Sb

---

| Atomic<br>Number | Coordinates (Angstroms) |           |           |
|------------------|-------------------------|-----------|-----------|
|                  | X                       | Y         | Z         |
| B                | 1.347743                | 0.000069  | -0.000392 |
| Sb               | -0.866534               | 0.000030  | 0.000029  |
| O                | 1.974046                | 1.216700  | -0.000198 |
| H                | 2.937137                | 1.199726  | 0.001833  |
| O                | 1.973545                | -1.216814 | -0.000124 |
| H                | 2.936677                | -1.200670 | 0.001235  |

---

---

---

(OH)<sub>2</sub>B-Sb (TS1)

---

| Atomic<br>Number | Coordinates (Angstroms) |           |           |
|------------------|-------------------------|-----------|-----------|
|                  | X                       | Y         | Z         |
| B                | -1.360280               | -0.421594 | 0.044283  |
| Sb               | 0.690410                | -0.177337 | -0.002983 |
| O                | -0.429254               | 1.600717  | -0.102754 |
| H                | -0.465248               | 1.982403  | 0.780619  |
| O                | -2.670019               | -0.431640 | 0.085622  |
| H                | -3.150050               | -0.182881 | -0.712827 |

---

---

---

HO-B-Sb-OH

---

| Atomic<br>Number | Coordinates (Angstroms) |           |           |
|------------------|-------------------------|-----------|-----------|
|                  | X                       | Y         | Z         |
| O                | -0.843151               | 1.659655  | -0.117228 |
| H                | -0.943981               | 2.000668  | 0.776826  |
| O                | 2.854731                | 0.161627  | -0.099829 |
| H                | 3.359633                | 0.306753  | 0.711352  |
| Sb               | -0.516702               | -0.327557 | 0.005236  |



B 1.568698 -0.034450 -0.003754

---

---

B-Sb(OH)<sub>2</sub> (TS2)

---

---

| Atomic<br>Number | Coordinates (Angstroms) |           |           |
|------------------|-------------------------|-----------|-----------|
|                  | X                       | Y         | Z         |
| B                | 0.676602                | 1.319740  | 1.357900  |
| Sb               | -0.131124               | -0.420054 | 0.065043  |
| O                | -1.221447               | 1.202861  | -0.362485 |
| H                | -1.249332               | 1.404906  | -1.303967 |
| O                | 1.564810                | 0.322201  | -0.689759 |
| H                | 1.806761                | 1.218669  | -0.384790 |

---

---

B-Sb(OH)<sub>2</sub>

---

---

| Atomic<br>Number | Coordinates (Angstroms) |           |           |
|------------------|-------------------------|-----------|-----------|
|                  | X                       | Y         | Z         |
| O                | -1.515456               | 0.284368  | 0.892198  |
| H                | -1.929674               | -0.441499 | 1.375873  |
| O                | 1.514062                | 0.276529  | 0.894556  |
| H                | 1.917491                | -0.449221 | 1.386977  |
| Sb               | -0.000472               | -0.278985 | -0.273010 |
| B                | 0.009483                | 2.126357  | -0.626670 |

---

---

H<sub>2</sub>B-Sb

---

---

| Atomic<br>Number | Coordinates (Angstroms) |           |           |
|------------------|-------------------------|-----------|-----------|
|                  | X                       | Y         | Z         |
| H                | 2.394323                | -1.038765 | -0.000085 |
| H                | 2.394231                | 1.038817  | -0.000085 |
| B                | 1.794383                | -0.000004 | 0.000044  |
| Sb               | -0.269813               | -0.000001 | -0.000001 |

---

---

## H2B-Sb (TS1)

---

| Atomic<br>Number | Coordinates (Angstroms) |           |           |
|------------------|-------------------------|-----------|-----------|
|                  | X                       | Y         | Z         |
| B                | -1.945095               | -0.049914 | -0.176775 |
| Sb               | 0.232840                | -0.009954 | -0.009448 |
| H                | -0.840253               | 1.331040  | 0.385712  |
| H                | -1.309135               | -0.573796 | 0.979988  |

---

---

## H-B-Sb-H

---

| Atomic<br>Number | Coordinates (Angstroms) |           |          |
|------------------|-------------------------|-----------|----------|
|                  | X                       | Y         | Z        |
| B                | 0.029553                | 2.027787  | 0.000000 |
| Sb               | 0.029553                | -0.262213 | 0.000000 |
| H                | -1.671653               | 0.017480  | 0.000000 |
| H                | 0.016680                | 3.216473  | 0.000000 |

---

---

## B-SbH2 (TS2)

---

| Atomic<br>Number | Coordinates (Angstroms) |           |           |
|------------------|-------------------------|-----------|-----------|
|                  | X                       | Y         | Z         |
| B                | -2.014002               | -0.049155 | -0.156102 |
| H                | -0.593849               | 1.480249  | 0.299762  |
| Sb               | 0.232677                | -0.015035 | -0.011144 |
| H                | -1.202666               | -0.467680 | 1.049080  |

---

---

## B-SbH2

---

| Atomic<br>Number | Coordinates (Angstroms) |           |           |
|------------------|-------------------------|-----------|-----------|
|                  | X                       | Y         | Z         |
| B                | 2.125674                | 0.000220  | -0.067035 |
| Sb               | -0.213598               | -0.000256 | -0.037839 |

---

|   |          |           |          |
|---|----------|-----------|----------|
| H | 0.135328 | -1.205708 | 1.138251 |
| H | 0.129791 | 1.217672  | 1.126722 |

-----  
(CH3)2B-Sb  
-----

| Atomic<br>Number | Coordinates (Angstroms) |           |           |
|------------------|-------------------------|-----------|-----------|
|                  | X                       | Y         | Z         |
| C                | 2.045845                | 1.380930  | -0.000023 |
| H                | 2.699475                | 1.430053  | 0.880590  |
| H                | 2.706082                | 1.428052  | -0.875722 |
| H                | 1.434768                | 2.287666  | -0.003291 |
| C                | 2.107944                | -1.351029 | -0.000059 |
| H                | 2.761159                | -1.372766 | 0.881798  |
| H                | 2.773487                | -1.367005 | -0.872680 |
| H                | 1.536405                | -2.282336 | -0.007037 |
| B                | 1.276651                | -0.004719 | -0.000743 |
| Sb               | -0.886615               | -0.005480 | 0.000011  |

-----  
(CH3)2B-Sb (TS1)  
-----

| Atomic<br>Number | Coordinates (Angstroms) |           |           |
|------------------|-------------------------|-----------|-----------|
|                  | X                       | Y         | Z         |
| B                | -1.264037               | -0.355451 | -0.000126 |
| Sb               | 0.740311                | -0.196398 | 0.000004  |
| C                | -0.515566               | 1.747687  | -0.000004 |
| H                | -0.205606               | 2.268105  | 0.902480  |
| H                | -0.204715               | 2.268679  | -0.901851 |
| H                | -1.609261               | 1.715870  | -0.000551 |
| C                | -2.794715               | -0.526532 | 0.000023  |
| H                | -3.267924               | -0.095237 | -0.887689 |
| H                | -3.018446               | -1.598111 | 0.001513  |
| H                | -3.268054               | -0.092688 | 0.886415  |

-----  
H3C-B-Sb-CH3  
-----

| Atomic | Coordinates (Angstroms) |  |  |
|--------|-------------------------|--|--|
|--------|-------------------------|--|--|

| Number | X         | Y         | Z         |
|--------|-----------|-----------|-----------|
| B      | -1.506227 | 0.117104  | -0.006456 |
| Sb     | 0.483096  | -0.388964 | 0.000226  |
| C      | -3.015585 | 0.329135  | 0.002279  |
| H      | -3.380246 | 0.820014  | 0.909215  |
| H      | -3.380943 | 0.869324  | -0.876231 |
| H      | -3.468626 | -0.672658 | -0.027604 |
| C      | 1.199560  | 1.698966  | 0.000277  |
| H      | 2.284943  | 1.630652  | -0.063047 |
| H      | 0.917229  | 2.196274  | 0.925217  |
| H      | 0.817018  | 2.239430  | -0.862137 |

B-Sb(CH<sub>3</sub>)<sub>2</sub> (TS<sub>2</sub>)

| Atomic<br>Number | Coordinates (Angstroms) |           |           |
|------------------|-------------------------|-----------|-----------|
|                  | X                       | Y         | Z         |
| B                | 1.330707                | 0.463292  | 1.283761  |
| Sb               | -0.286018               | -0.422715 | -0.011029 |
| C                | -1.036736               | 1.615923  | -0.079073 |
| H                | -0.980291               | 1.999397  | -1.096566 |
| H                | -2.080842               | 1.578367  | 0.235425  |
| H                | -0.477834               | 2.255249  | 0.607316  |
| C                | 1.873630                | 0.398197  | -0.477946 |
| H                | 2.756569                | -0.185858 | -0.207374 |
| H                | 1.583173                | 0.051885  | -1.495706 |
| H                | 2.111254                | 1.458263  | -0.557300 |

B-Sb(CH<sub>3</sub>)<sub>2</sub>

| Atomic<br>Number | Coordinates (Angstroms) |          |           |
|------------------|-------------------------|----------|-----------|
|                  | X                       | Y        | Z         |
| C                | 1.606565                | 1.023489 | -0.348989 |
| H                | 1.450980                | 1.492424 | -1.321122 |
| H                | 1.616287                | 1.797389 | 0.423809  |
| H                | 2.557561                | 0.492426 | -0.342237 |

|    |           |           |           |
|----|-----------|-----------|-----------|
| C  | -1.605660 | 1.022591  | -0.352965 |
| H  | -1.447878 | 1.491273  | -1.324772 |
| H  | -1.615949 | 1.796646  | 0.419566  |
| H  | -2.556734 | 0.491872  | -0.347646 |
| Sb | 0.000366  | -0.443752 | -0.065246 |
| B  | -0.005674 | 0.558569  | 2.006335  |

(SiH3)2B-Sb

| Atomic<br>Number | Coordinates (Angstroms) |           |           |
|------------------|-------------------------|-----------|-----------|
|                  | X                       | Y         | Z         |
| B                | -0.731694               | -0.000183 | 0.000703  |
| Sb               | 1.280529                | -0.001592 | -0.000019 |
| Si               | -1.765570               | -1.721601 | -0.000004 |
| H                | -2.630784               | -1.783323 | -1.210038 |
| H                | -0.910570               | -2.940290 | 0.002329  |
| H                | -2.635860               | -1.781636 | 1.206465  |
| Si               | -1.757586               | 1.726202  | -0.000080 |
| H                | -2.622668               | 1.792577  | 1.209777  |
| H                | -0.897270               | 2.941175  | -0.003043 |
| H                | -2.627157               | 1.789225  | -1.206887 |

(SiH3)2B-Sb (TS1)

| Atomic<br>Number | Coordinates (Angstroms) |           |           |
|------------------|-------------------------|-----------|-----------|
|                  | X                       | Y         | Z         |
| B                | 1.138257                | -0.234630 | 0.002769  |
| Sb               | -0.837605               | -0.688205 | -0.000145 |
| H                | -2.468303               | 2.157107  | 0.050525  |
| Si               | -0.997096               | 1.921225  | -0.000207 |
| H                | -0.468265               | 2.554769  | -1.235920 |
| H                | -0.384481               | 2.566462  | 1.189658  |
| Si               | 3.105767                | 0.106542  | -0.000251 |
| H                | 3.738126                | -0.475279 | -1.215334 |
| H                | 3.746455                | -0.496597 | 1.199850  |
| H                | 3.341638                | 1.576417  | 0.011177  |

---

---

H3Si-B-Sb-SiH3

---

| Atomic<br>Number | Coordinates (Angstroms) |           |           |
|------------------|-------------------------|-----------|-----------|
|                  | X                       | Y         | Z         |
| B                | -0.919493               | -0.323949 | -0.001828 |
| Sb               | 1.090920                | -0.473316 | 0.000069  |
| Si               | 0.024206                | 1.914292  | 0.000033  |
| H                | 0.495576                | 2.619457  | -1.217366 |
| H                | -1.467164               | 2.011610  | -0.001670 |
| H                | 0.492612                | 2.618021  | 1.219463  |
| Si               | -2.903352               | -0.477631 | 0.000159  |
| H                | -3.499481               | 0.163453  | -1.202259 |
| H                | -3.256702               | -1.922645 | -0.003568 |
| H                | -3.496241               | 0.155715  | 1.208317  |

---

---

B-Sb(Si H3)2 (TS2)

---

| Atomic<br>Number | Coordinates (Angstroms) |           |           |
|------------------|-------------------------|-----------|-----------|
|                  | X                       | Y         | Z         |
| B                | -0.232297               | 0.231659  | 1.943263  |
| Sb               | 0.041976                | -0.769517 | -0.086822 |
| H                | 1.853046                | 1.721402  | -1.470461 |
| Si               | 1.828706                | 1.106042  | -0.115353 |
| H                | 3.141830                | 0.468271  | 0.172148  |
| H                | 1.557680                | 2.164257  | 0.898465  |
| Si               | -1.880266               | 1.020147  | -0.182326 |
| H                | -2.861222               | 0.784419  | 0.910403  |
| H                | -2.543611               | 0.757894  | -1.487633 |
| H                | -1.405170               | 2.424179  | -0.143795 |

---

---

B-Sb(SiH3)2

---

| Atomic<br>Number | Coordinates (Angstroms) |   |   |
|------------------|-------------------------|---|---|
|                  | X                       | Y | Z |

---

---

|    |           |           |           |
|----|-----------|-----------|-----------|
| H  | -1.529163 | 2.001927  | -1.284860 |
| H  | -3.112334 | 0.396782  | -0.343068 |
| H  | -1.819810 | 1.837352  | 1.112676  |
| H  | 1.521843  | 2.012274  | -1.276558 |
| H  | 3.109848  | 0.396685  | -0.359616 |
| H  | 1.828800  | 1.825159  | 1.117218  |
| Si | -1.799395 | 1.065105  | -0.167101 |
| Si | 1.798635  | 1.064479  | -0.169762 |
| B  | 0.007540  | 0.331899  | 1.948077  |
| Sb | -0.000515 | -0.783213 | -0.078237 |

---



---

B3LYP/LANL2DZ+dp

---

F2B-Sb

---

| Atomic<br>Number | Coordinates (Angstroms) |           |           |
|------------------|-------------------------|-----------|-----------|
|                  | X                       | Y         | Z         |
| F                | -2.051187               | 1.155307  | -0.000029 |
| F                | -2.051414               | -1.155207 | -0.000029 |
| B                | -1.336048               | -0.000023 | 0.000137  |
| Sb               | 0.854973                | -0.000015 | -0.000003 |

---



---

F2B-Sb (TS1)

---

| Atomic<br>Number | Coordinates (Angstroms) |           |          |
|------------------|-------------------------|-----------|----------|
|                  | X                       | Y         | Z        |
| B                | -0.719459               | 1.244521  | 0.000000 |
| Sb               | 0.000000                | -0.711608 | 0.000000 |
| F                | 1.403118                | 0.826354  | 0.000000 |
| F                | -1.003419               | 2.514692  | 0.000000 |

---



---

F-B-Sb-F

---

| Atomic<br>Number | Coordinates (Angstroms) |           |           |
|------------------|-------------------------|-----------|-----------|
|                  | X                       | Y         | Z         |
| Sb               | -0.513855               | -0.316435 | -0.000005 |
| B                | 1.581077                | 0.009706  | 0.000142  |
| F                | -0.842805               | 1.632655  | -0.000001 |
| F                | 2.876271                | 0.155087  | -0.000049 |

---

B-SbF2 (TS2)

---

| Atomic<br>Number | Coordinates (Angstroms) |           |           |
|------------------|-------------------------|-----------|-----------|
|                  | X                       | Y         | Z         |
| B                | 2.001279                | -0.265150 | 0.812159  |
| Sb               | -0.444617               | -0.311279 | -0.026219 |
| F                | -0.679186               | 1.618885  | 0.122013  |
| F                | 2.086861                | 0.292333  | -0.424640 |

---

B-SbF2

---

| Atomic<br>Number | Coordinates (Angstroms) |           |           |
|------------------|-------------------------|-----------|-----------|
|                  | X                       | Y         | Z         |
| Sb               | 0.000240                | -0.345706 | -0.203347 |
| B                | -0.002403               | 1.985215  | -1.030642 |
| F                | 1.447717                | 0.429132  | 0.862070  |
| F                | -1.447745               | 0.426968  | 0.862812  |

---

(OH)2B-Sb

---

| Atomic<br>Number | Coordinates (Angstroms) |           |           |
|------------------|-------------------------|-----------|-----------|
|                  | X                       | Y         | Z         |
| B                | 1.352623                | -0.000101 | -0.000407 |
| Sb               | -0.873613               | -0.000061 | 0.000024  |
| O                | 1.991307                | 1.227240  | -0.000420 |

---



|   |          |           |           |
|---|----------|-----------|-----------|
| H | 2.961025 | 1.192139  | 0.003855  |
| O | 1.992216 | -1.226894 | 0.000247  |
| H | 2.961954 | -1.191297 | -0.001636 |

(OH)<sub>2</sub>B-Sb (TS1)

| Atomic<br>Number | Coordinates (Angstroms) |           |           |
|------------------|-------------------------|-----------|-----------|
|                  | X                       | Y         | Z         |
| B                | -1.358521               | -0.418447 | 0.033444  |
| Sb               | 0.706114                | -0.169559 | -0.002518 |
| O                | -0.502973               | 1.590761  | -0.101961 |
| H                | -0.557573               | 1.997876  | 0.777449  |
| O                | -2.683567               | -0.475712 | 0.087314  |
| H                | -3.169339               | -0.178521 | -0.699066 |

HO-B-Sb-OH

| Atomic<br>Number | Coordinates (Angstroms) |           |           |
|------------------|-------------------------|-----------|-----------|
|                  | X                       | Y         | Z         |
| O                | -0.879714               | 1.660802  | -0.116670 |
| H                | -1.026904               | 2.026686  | 0.768427  |
| O                | 2.882455                | 0.181065  | -0.101026 |
| H                | 3.377853                | 0.310295  | 0.726017  |
| Sb               | -0.515317               | -0.332393 | 0.005102  |
| B                | 1.581661                | -0.023978 | -0.002614 |

B-Sb(OH)<sub>2</sub> (TS2)

| Atomic<br>Number | Coordinates (Angstroms) |          |           |
|------------------|-------------------------|----------|-----------|
|                  | X                       | Y        | Z         |
| O                | -0.879714               | 1.660802 | -0.116670 |
| H                | -1.026904               | 2.026686 | 0.768427  |
| O                | 2.882455                | 0.181065 | -0.101026 |
| H                | 3.377853                | 0.310295 | 0.726017  |

|    |           |           |           |
|----|-----------|-----------|-----------|
| Sb | -0.515317 | -0.332393 | 0.005102  |
| B  | 1.581661  | -0.023978 | -0.002614 |

B-Sb(OH)<sub>2</sub>

| Atomic<br>Number | Coordinates (Angstroms) |           |           |
|------------------|-------------------------|-----------|-----------|
|                  | X                       | Y         | Z         |
| O                | -1.520723               | 0.262630  | 0.901649  |
| H                | -1.944274               | -0.472579 | 1.369009  |
| O                | 1.521637                | 0.256821  | 0.901567  |
| H                | 1.936324                | -0.477805 | 1.376794  |
| Sb               | -0.000596               | -0.273942 | -0.278967 |
| B                | 0.006207                | 2.153165  | -0.588844 |

H<sub>2</sub>B-Sb

| Atomic<br>Number | Coordinates (Angstroms) |           |           |
|------------------|-------------------------|-----------|-----------|
|                  | X                       | Y         | Z         |
| H                | -2.416410               | -1.039942 | 0.000044  |
| H                | -2.416328               | 1.039986  | 0.000044  |
| B                | -1.813321               | -0.000003 | -0.000023 |
| Sb               | 0.272536                | -0.000001 | 0.000001  |

H<sub>2</sub>B-Sb (TS1)

| Atomic<br>Number | Coordinates (Angstroms) |           |           |
|------------------|-------------------------|-----------|-----------|
|                  | X                       | Y         | Z         |
| B                | -2.020042               | -0.056488 | -0.163383 |
| Sb               | 0.231218                | -0.023928 | -0.006670 |
| H                | -0.284393               | 1.626507  | 0.050796  |
| H                | -1.407509               | -0.123753 | 1.106285  |

H-B-Sb-H

---

| Atomic<br>Number | Coordinates (Angstroms) |           |          |
|------------------|-------------------------|-----------|----------|
|                  | X                       | Y         | Z        |
| B                | 0.029509                | 2.028911  | 0.000000 |
| Sb               | 0.029509                | -0.261089 | 0.000000 |
| H                | -1.690772               | -0.051024 | 0.000000 |
| H                | 0.038294                | 3.222004  | 0.000000 |

---

B-SbH<sub>2</sub> (TS2)

---

| Atomic<br>Number | Coordinates (Angstroms) |           |           |
|------------------|-------------------------|-----------|-----------|
|                  | X                       | Y         | Z         |
| B                | -2.042599               | -0.023325 | -0.156854 |
| H                | -0.849334               | 1.268371  | 0.534017  |
| Sb               | 0.239417                | -0.006827 | -0.012171 |
| H                | -1.147917               | -0.803559 | 0.870953  |

---

B-SbH<sub>2</sub>

---

| Atomic<br>Number | Coordinates (Angstroms) |           |           |
|------------------|-------------------------|-----------|-----------|
|                  | X                       | Y         | Z         |
| B                | -2.174698               | -0.000015 | -0.035207 |
| Sb               | 0.212060                | 0.000006  | -0.041602 |
| H                | 0.029117                | 1.237670  | 1.149000  |
| H                | 0.029296                | -1.237917 | 1.148762  |

---

(CH<sub>3</sub>)<sub>2</sub>B-Sb

---

| Atomic<br>Number | Coordinates (Angstroms) |          |           |
|------------------|-------------------------|----------|-----------|
|                  | X                       | Y        | Z         |
| C                | 2.042607                | 1.385805 | 0.000176  |
| H                | 2.711138                | 1.424459 | 0.877100  |
| H                | 2.694190                | 1.432664 | -0.888979 |

---

|    |           |           |           |
|----|-----------|-----------|-----------|
| H  | 1.435362  | 2.302175  | 0.009779  |
| C  | 2.101943  | -1.356955 | -0.000294 |
| H  | 2.750462  | -1.379276 | 0.892312  |
| H  | 2.778082  | -1.364115 | -0.872320 |
| H  | 1.532624  | -2.296736 | -0.016826 |
| B  | 1.257272  | -0.004821 | -0.000073 |
| Sb | -0.883441 | -0.005258 | 0.000000  |

(CH<sub>3</sub>)<sub>2</sub>B-Sb (TS1)

| Atomic<br>Number | Coordinates (Angstroms) |           |           |
|------------------|-------------------------|-----------|-----------|
|                  | X                       | Y         | Z         |
| B                | -1.248719               | -0.334786 | -0.000038 |
| Sb               | 0.768221                | -0.175463 | 0.000001  |
| C                | -0.697701               | 1.717162  | 0.000041  |
| H                | -0.394730               | 2.246361  | 0.907468  |
| H                | -0.392152               | 2.247367  | -0.905947 |
| H                | -1.796246               | 1.684986  | -0.001721 |
| C                | -2.777159               | -0.622179 | -0.000001 |
| H                | -3.279367               | -0.208693 | -0.889413 |
| H                | -2.944652               | -1.709318 | 0.000426  |
| H                | -3.279363               | -0.208044 | 0.889113  |

H<sub>3</sub>C-B-Sb-CH<sub>3</sub>

| Atomic<br>Number | Coordinates (Angstroms) |           |           |
|------------------|-------------------------|-----------|-----------|
|                  | X                       | Y         | Z         |
| B                | -1.523161               | 0.117275  | -0.010109 |
| Sb               | 0.487036                | -0.392214 | 0.000332  |
| C                | -3.045449               | 0.333883  | 0.002584  |
| H                | -3.401579               | 0.849869  | 0.907305  |
| H                | -3.415322               | 0.863874  | -0.888653 |
| H                | -3.511428               | -0.669240 | -0.002789 |
| C                | 1.216456                | 1.707989  | 0.000468  |
| H                | 2.306513                | 1.649374  | -0.108423 |
| H                | 0.972754                | 2.199342  | 0.948134  |

|   |          |          |           |
|---|----------|----------|-----------|
| H | 0.799996 | 2.272080 | -0.840257 |
|---|----------|----------|-----------|

-----  
-----  
B-Sb(CH3)2 (TS2)

| Atomic<br>Number | Coordinates (Angstroms) |           |           |
|------------------|-------------------------|-----------|-----------|
|                  | X                       | Y         | Z         |
| B                | 1.426116                | 0.387728  | 1.279992  |
| Sb               | -0.305470               | -0.422071 | -0.014942 |
| C                | -1.032421               | 1.649925  | -0.050941 |
| H                | -1.015925               | 2.043929  | -1.073464 |
| H                | -2.071213               | 1.631976  | 0.306375  |
| H                | -0.436914               | 2.286459  | 0.616169  |
| C                | 1.931939                | 0.395577  | -0.474409 |
| H                | 2.815973                | -0.235030 | -0.310189 |
| H                | 1.555171                | 0.130651  | -1.499598 |
| H                | 2.204177                | 1.455991  | -0.525097 |

-----  
-----  
B-Sb(CH3)2

| Atomic<br>Number | Coordinates (Angstroms) |           |           |
|------------------|-------------------------|-----------|-----------|
|                  | X                       | Y         | Z         |
| C                | 1.629175                | 1.095495  | 0.072543  |
| H                | 1.584043                | 1.826280  | -0.744932 |
| H                | 1.538125                | 1.619761  | 1.032899  |
| H                | 2.590611                | 0.568401  | 0.031959  |
| C                | -1.629411               | 1.095301  | 0.072787  |
| H                | -1.583191               | 1.827199  | -0.743583 |
| H                | -1.539167               | 1.618193  | 1.033838  |
| H                | -2.590836               | 0.568397  | 0.030513  |
| Sb               | -0.000002               | -0.359783 | -0.236399 |
| B                | 0.000381                | -0.564814 | 2.108736  |

-----  
-----  
(SiH3)2B-Sb

| Atomic | Coordinates (Angstroms) |  |  |
|--------|-------------------------|--|--|
|--------|-------------------------|--|--|

| Number | X         | Y         | Z         |
|--------|-----------|-----------|-----------|
| B      | -0.743809 | -0.000145 | 0.000152  |
| Sb     | 1.297793  | -0.000933 | -0.000001 |
| Si     | -1.787395 | -1.725470 | -0.000003 |
| H      | -2.657133 | -1.785489 | -1.204256 |
| H      | -0.939514 | -2.946442 | -0.000494 |
| H      | -2.656111 | -1.785253 | 1.205109  |
| Si     | -1.782657 | 1.728170  | -0.000008 |
| H      | -2.652699 | 1.790711  | 1.203961  |
| H      | -0.931577 | 2.946929  | 0.000619  |
| H      | -2.650626 | 1.790034  | -1.205477 |

(SiH3)2B-Sb (TS1)

| Atomic<br>Number | Coordinates (Angstroms) |           |           |
|------------------|-------------------------|-----------|-----------|
|                  | X                       | Y         | Z         |
| B                | 1.191619                | -0.180144 | -0.000060 |
| Sb               | -0.772941               | -0.719728 | -0.000018 |
| H                | -2.706780               | 1.977660  | 0.206321  |
| Si               | -1.236594               | 1.862028  | -0.000388 |
| H                | -0.892570               | 2.488342  | -1.299972 |
| H                | -0.550626               | 2.588652  | 1.096986  |
| Si               | 3.143350                | 0.242005  | -0.000099 |
| H                | 3.803836                | -0.252962 | -1.237408 |
| H                | 3.818396                | -0.371761 | 1.172543  |
| H                | 3.295067                | 1.720448  | 0.069545  |

H3Si-B-Sb-SiH3

| Atomic<br>Number | Coordinates (Angstroms) |           |           |
|------------------|-------------------------|-----------|-----------|
|                  | X                       | Y         | Z         |
| Sb               | -1.068742               | -0.510330 | 0.000056  |
| Si               | -0.151613               | 1.961409  | -0.000144 |
| H                | -0.682540               | 2.644779  | -1.203253 |
| H                | -0.651300               | 2.629697  | 1.224658  |

|    |          |           |           |
|----|----------|-----------|-----------|
| H  | 1.327019 | 2.125924  | -0.016351 |
| Si | 2.957088 | -0.405833 | 0.000133  |
| H  | 3.521071 | 0.254126  | 1.203954  |
| H  | 3.368735 | -1.833187 | 0.002690  |
| H  | 3.524391 | 0.250947  | -1.203844 |
| B  | 0.964367 | -0.364699 | -0.002110 |

-----  
 -----  
 B-Sb(SiH3)2 (TS2)

| Atomic<br>Number | Coordinates (Angstroms) |           |           |
|------------------|-------------------------|-----------|-----------|
|                  | X                       | Y         | Z         |
| B                | -0.460122               | 0.315704  | 1.810528  |
| Sb               | 0.089011                | -0.784903 | -0.070052 |
| H                | 2.017753                | 1.611903  | -1.494989 |
| Si               | 1.815566                | 1.173776  | -0.090431 |
| H                | 3.085886                | 0.627263  | 0.448417  |
| H                | 1.377575                | 2.332051  | 0.728630  |
| Si               | -1.938939               | 0.979360  | -0.206200 |
| H                | -3.051430               | 0.658177  | 0.716933  |
| H                | -2.381893               | 0.671291  | -1.592081 |
| H                | -1.559645               | 2.406950  | -0.134068 |

-----  
 -----  
 B-Sb(SiH3)2

| Atomic<br>Number | Coordinates (Angstroms) |           |           |
|------------------|-------------------------|-----------|-----------|
|                  | X                       | Y         | Z         |
| H                | -1.516666               | 2.291898  | -0.768077 |
| H                | -3.090132               | 0.439784  | -0.758550 |
| H                | -2.307403               | 1.370120  | 1.328560  |
| H                | 1.515787                | 2.292707  | -0.766557 |
| H                | 3.089629                | 0.440667  | -0.761150 |
| H                | 2.308706                | 1.367990  | 1.328139  |
| Si               | -1.923087               | 1.048100  | -0.071802 |
| Si               | 1.923119                | 1.047983  | -0.072460 |
| B                | 0.001875                | -0.298382 | 2.141608  |
| Sb               | -0.000191               | -0.706989 | -0.162564 |

-----  
-----  
B3LYP/LANL2DZ+dp

-----  
(SiMe(SitBu3)2)2B-Sb  
-----

| Atomic<br>Number | Coordinates (Angstroms) |           |           |
|------------------|-------------------------|-----------|-----------|
|                  | X                       | Y         | Z         |
| Si               | -1.895886               | 0.067905  | 0.575595  |
| Si               | -3.092413               | -2.325849 | 1.123868  |
| Si               | -3.504124               | 1.927380  | -0.687686 |
| C                | -2.074165               | -3.111028 | 2.849089  |
| C                | -2.966658               | -3.661740 | -0.454064 |
| C                | -5.103370               | -2.137679 | 1.734171  |
| C                | -3.781528               | -4.947605 | -0.189382 |
| H                | -4.854654               | -4.755055 | -0.144570 |
| H                | -3.497581               | -5.445334 | 0.738138  |
| H                | -3.629375               | -5.673662 | -0.997731 |
| C                | -1.506991               | -4.054837 | -0.669060 |
| H                | -0.900097               | -3.160785 | -0.833506 |
| H                | -1.387293               | -4.699879 | -1.547955 |
| H                | -1.121363               | -4.614770 | 0.183525  |
| C                | -3.454144               | -3.062155 | -1.782154 |
| H                | -2.881167               | -2.169441 | -2.049727 |
| H                | -4.519442               | -2.827258 | -1.753583 |
| H                | -3.322882               | -3.775771 | -2.605556 |
| C                | -2.382657               | -4.607001 | 3.062080  |
| H                | -3.448158               | -4.815596 | 3.151371  |
| H                | -1.908847               | -4.966449 | 3.983938  |
| H                | -1.984854               | -5.223182 | 2.251449  |
| C                | -0.568236               | -2.974299 | 2.635585  |
| H                | -0.012529               | -3.136148 | 3.566465  |
| H                | -0.329504               | -1.983431 | 2.265172  |
| H                | -0.197864               | -3.710848 | 1.926176  |
| C                | -2.450809               | -2.327114 | 4.123640  |
| H                | -2.303253               | -1.254041 | 4.013204  |
| H                | -1.830714               | -2.648024 | 4.969960  |
| H                | -3.482418               | -2.493083 | 4.430897  |



|   |           |           |           |
|---|-----------|-----------|-----------|
| C | -5.576309 | -3.335610 | 2.588270  |
| H | -6.653027 | -3.260799 | 2.787090  |
| H | -5.095088 | -3.379244 | 3.564422  |
| H | -5.410618 | -4.291555 | 2.084307  |
| C | -6.028119 | -2.117743 | 0.505198  |
| H | -5.636978 | -1.480128 | -0.274682 |
| H | -7.031153 | -1.763407 | 0.769538  |
| H | -6.158377 | -3.109534 | 0.065105  |
| C | -5.262896 | -0.849692 | 2.561412  |
| H | -4.860782 | 0.012394  | 2.033758  |
| H | -4.745843 | -0.905328 | 3.522062  |
| H | -6.318135 | -0.648754 | 2.778800  |
| C | -2.408871 | 2.806467  | -2.277936 |
| C | -5.291721 | 1.223368  | -1.602273 |
| C | -4.112854 | 3.440128  | 0.689856  |
| C | -2.901178 | 4.268833  | 1.127218  |
| H | -3.196755 | 5.066723  | 1.819239  |
| H | -2.399012 | 4.748751  | 0.285939  |
| H | -2.190349 | 3.642415  | 1.658536  |
| C | -4.757290 | 2.828273  | 1.949880  |
| H | -5.054729 | 3.618126  | 2.650987  |
| H | -4.068949 | 2.180609  | 2.488283  |
| H | -5.659134 | 2.257997  | 1.726179  |
| C | -5.142498 | 4.403891  | 0.059139  |
| H | -5.361082 | 5.232908  | 0.744094  |
| H | -6.098301 | 3.917261  | -0.137746 |
| H | -4.792831 | 4.850837  | -0.870682 |
| C | -6.385986 | 1.007339  | -0.542387 |
| H | -6.846034 | 1.946290  | -0.225425 |
| H | -5.999279 | 0.528361  | 0.348874  |
| H | -7.201321 | 0.389492  | -0.936484 |
| C | -5.877533 | 2.215699  | -2.632340 |
| H | -6.046318 | 3.208733  | -2.213974 |
| H | -6.847947 | 1.854807  | -2.996673 |
| H | -5.250142 | 2.326783  | -3.516504 |
| C | -4.970144 | -0.077130 | -2.343799 |
| H | -5.877253 | -0.643487 | -2.581389 |
| H | -4.324124 | -0.688414 | -1.726934 |
| H | -4.451232 | 0.090353  | -3.290399 |
| C | -0.976569 | 3.084660  | -1.829513 |

|    |           |           |           |
|----|-----------|-----------|-----------|
| H  | -0.942338 | 3.909652  | -1.117342 |
| H  | -0.364608 | 3.387523  | -2.686861 |
| H  | -0.503862 | 2.220320  | -1.370048 |
| C  | -3.002779 | 4.160624  | -2.723910 |
| H  | -2.910757 | 4.922078  | -1.944680 |
| H  | -4.052462 | 4.096497  | -3.007868 |
| H  | -2.461393 | 4.544510  | -3.597726 |
| C  | -2.388653 | 1.853496  | -3.492285 |
| H  | -3.300264 | 1.928368  | -4.088626 |
| H  | -2.282062 | 0.809824  | -3.197195 |
| H  | -1.566836 | 2.098682  | -4.175339 |
| C  | -1.756044 | 0.741933  | 2.303831  |
| H  | -1.486839 | 1.794434  | 2.297672  |
| H  | -0.993961 | 0.205775  | 2.870401  |
| H  | -2.690516 | 0.641623  | 2.856170  |
| Si | 1.949997  | -0.079623 | 0.584024  |
| Si | 3.630035  | -1.922970 | -0.633583 |
| Si | 2.993278  | 2.403621  | 1.070006  |
| C  | 3.467717  | 3.369498  | -0.712340 |
| C  | 4.685364  | 2.404676  | 2.370794  |
| C  | 1.563417  | 3.534578  | 2.145085  |
| C  | 2.345586  | 3.174776  | -1.744299 |
| H  | 1.493988  | 3.809583  | -1.506334 |
| H  | 1.997516  | 2.143349  | -1.795373 |
| H  | 2.673418  | 3.465515  | -2.749423 |
| C  | 4.765068  | 2.801517  | -1.306207 |
| H  | 5.625876  | 2.964857  | -0.655451 |
| H  | 5.002621  | 3.275931  | -2.266079 |
| H  | 4.661672  | 1.737201  | -1.494838 |
| C  | 3.666620  | 4.889363  | -0.515449 |
| H  | 4.434596  | 5.121914  | 0.223134  |
| H  | 2.745603  | 5.390336  | -0.208956 |
| H  | 3.975817  | 5.361306  | -1.456426 |
| C  | 5.700460  | 1.382143  | 1.884886  |
| H  | 6.457162  | 1.156748  | 2.644674  |
| H  | 6.242460  | 1.724625  | 1.001928  |
| H  | 5.170871  | 0.473711  | 1.645083  |
| C  | 4.273773  | 2.028351  | 3.808735  |
| H  | 5.156311  | 1.816002  | 4.424749  |
| H  | 3.637761  | 1.142120  | 3.841004  |

|   |           |           |           |
|---|-----------|-----------|-----------|
| H | 3.755743  | 2.846115  | 4.311800  |
| C | 5.405859  | 3.770361  | 2.386777  |
| H | 6.226875  | 3.759137  | 3.114569  |
| H | 4.756363  | 4.600331  | 2.658041  |
| H | 5.855456  | 4.003512  | 1.417656  |
| C | 0.968568  | 2.708274  | 3.298498  |
| H | 1.674034  | 2.536781  | 4.111572  |
| H | 0.636775  | 1.735427  | 2.952707  |
| H | 0.104471  | 3.218928  | 3.740044  |
| C | 0.446234  | 3.934039  | 1.186342  |
| H | -0.292702 | 4.542266  | 1.714569  |
| H | -0.047926 | 3.051286  | 0.779069  |
| H | 0.803711  | 4.554080  | 0.364522  |
| C | 2.149644  | 4.832621  | 2.738603  |
| H | 2.831433  | 4.636736  | 3.567759  |
| H | 1.351087  | 5.461269  | 3.152521  |
| H | 2.675679  | 5.435780  | 1.997157  |
| C | 3.029049  | -3.885295 | -0.067459 |
| C | 3.488419  | -1.774793 | -2.723224 |
| C | 5.658655  | -1.839951 | -0.026001 |
| C | 5.769463  | -1.874737 | 1.517876  |
| H | 6.661608  | -1.338807 | 1.860595  |
| H | 5.885112  | -2.892633 | 1.901649  |
| H | 4.894822  | -1.466173 | 2.022896  |
| C | 6.494978  | -3.036491 | -0.540658 |
| H | 7.558348  | -2.875912 | -0.320663 |
| H | 6.416491  | -3.189339 | -1.615576 |
| H | 6.225578  | -3.971657 | -0.045528 |
| C | 6.285843  | -0.574320 | -0.633250 |
| H | 7.263165  | -0.358609 | -0.187424 |
| H | 5.643468  | 0.284879  | -0.486663 |
| H | 6.445006  | -0.667857 | -1.710858 |
| C | 3.451054  | -4.197349 | 1.382316  |
| H | 4.514576  | -4.437990 | 1.444194  |
| H | 2.923517  | -5.081117 | 1.761331  |
| H | 3.246762  | -3.377677 | 2.071221  |
| C | 1.514412  | -3.969666 | -0.178147 |
| H | 1.036671  | -3.112707 | 0.294434  |
| H | 1.143026  | -4.884982 | 0.296055  |
| H | 1.191434  | -4.009332 | -1.220188 |

|    |           |           |           |
|----|-----------|-----------|-----------|
| C  | 3.623279  | -4.969796 | -0.994210 |
| H  | 4.710983  | -4.958917 | -1.027211 |
| H  | 3.268032  | -4.881298 | -2.021580 |
| H  | 3.326629  | -5.967991 | -0.648503 |
| C  | 3.498010  | -0.291856 | -3.132343 |
| H  | 4.468857  | 0.166589  | -2.929052 |
| H  | 2.735089  | 0.278839  | -2.606919 |
| H  | 3.314794  | -0.177220 | -4.207139 |
| C  | 4.672770  | -2.461211 | -3.438002 |
| H  | 5.620250  | -1.952409 | -3.249145 |
| H  | 4.525838  | -2.443620 | -4.525277 |
| H  | 4.780272  | -3.509360 | -3.148088 |
| C  | 2.203038  | -2.459795 | -3.229910 |
| H  | 1.362359  | -2.311185 | -2.557754 |
| H  | 2.328874  | -3.540601 | -3.336697 |
| H  | 1.921158  | -2.089731 | -4.222495 |
| C  | 1.964230  | -0.780671 | 2.316398  |
| H  | 2.938938  | -0.637905 | 2.785508  |
| H  | 1.787954  | -1.853298 | 2.298428  |
| H  | 1.217123  | -0.326711 | 2.966237  |
| Sb | -0.023810 | -0.250536 | -2.471342 |
| B  | 0.016023  | -0.082010 | -0.238230 |

-----  
 -----  
 SiMe(SitBu3)2-B-Sb-SiMe(SitBu3)2  
 -----

| Atomic<br>Number | Coordinates (Angstroms) |           |           |
|------------------|-------------------------|-----------|-----------|
|                  | X                       | Y         | Z         |
| Si               | -2.713429               | -0.277702 | -0.612599 |
| Si               | -3.555623               | 2.087735  | -1.145294 |
| Si               | -3.904550               | -1.915132 | 1.077783  |
| C                | -2.249461               | 2.880059  | -2.640283 |
| C                | -3.372808               | 3.218582  | 0.592302  |
| C                | -5.475360               | 2.192331  | -1.938650 |
| C                | -4.031465               | 4.604752  | 0.449814  |
| H                | -5.115675               | 4.527403  | 0.330866  |
| H                | -3.639523               | 5.172890  | -0.395170 |
| H                | -3.858202               | 5.207973  | 1.349392  |
| C                | -1.885731               | 3.400510  | 0.962264  |

|   |           |           |           |
|---|-----------|-----------|-----------|
| H | -1.371416 | 2.440710  | 1.054967  |
| H | -1.783181 | 3.915604  | 1.925047  |
| H | -1.350253 | 4.004484  | 0.227638  |
| C | -4.058054 | 2.489871  | 1.761481  |
| H | -3.620352 | 1.504288  | 1.905643  |
| H | -5.131107 | 2.366510  | 1.605088  |
| H | -3.933290 | 3.043430  | 2.699706  |
| C | -2.265742 | 4.421747  | -2.622677 |
| H | -3.273033 | 4.829475  | -2.729047 |
| H | -1.668422 | 4.821468  | -3.451281 |
| H | -1.831783 | 4.826622  | -1.706049 |
| C | -0.820845 | 2.394085  | -2.372870 |
| H | -0.100179 | 2.906739  | -3.020939 |
| H | -0.731255 | 1.326136  | -2.586453 |
| H | -0.520485 | 2.571800  | -1.340847 |
| C | -2.646593 | 2.393237  | -4.049592 |
| H | -2.778274 | 1.310048  | -4.092204 |
| H | -1.868893 | 2.652287  | -4.778885 |
| H | -3.562840 | 2.864975  | -4.407545 |
| C | -5.769468 | 3.588612  | -2.536570 |
| H | -6.811935 | 3.651131  | -2.872936 |
| H | -5.153641 | 3.808045  | -3.409502 |
| H | -5.619276 | 4.392983  | -1.813905 |
| C | -6.525902 | 1.946406  | -0.844794 |
| H | -6.373748 | 0.977868  | -0.384016 |
| H | -7.540511 | 1.949699  | -1.260945 |
| H | -6.502371 | 2.712652  | -0.066540 |
| C | -5.676696 | 1.142854  | -3.054556 |
| H | -5.401148 | 0.139740  | -2.734215 |
| H | -5.096583 | 1.366050  | -3.950865 |
| H | -6.726915 | 1.107327  | -3.368760 |
| C | -3.245931 | -1.531586 | 3.043464  |
| C | -5.952975 | -1.906603 | 0.905749  |
| C | -3.184552 | -3.857861 | 0.488101  |
| C | -1.651121 | -3.791247 | 0.369807  |
| H | -1.237473 | -4.774479 | 0.116129  |
| H | -1.191294 | -3.476859 | 1.311015  |
| H | -1.328584 | -3.100288 | -0.409017 |
| C | -3.805062 | -4.258176 | -0.867193 |
| H | -3.280645 | -5.122798 | -1.291687 |

|    |           |           |           |
|----|-----------|-----------|-----------|
| H  | -3.767575 | -3.462556 | -1.607986 |
| H  | -4.851262 | -4.556586 | -0.751823 |
| C  | -3.544704 | -4.968252 | 1.501646  |
| H  | -3.470437 | -5.955797 | 1.028601  |
| H  | -4.554158 | -4.878837 | 1.899961  |
| H  | -2.852092 | -5.006159 | 2.343751  |
| C  | -6.365167 | -1.891388 | -0.580601 |
| H  | -6.083743 | -2.805793 | -1.105270 |
| H  | -5.904144 | -1.060745 | -1.108572 |
| H  | -7.451681 | -1.791616 | -0.688390 |
| C  | -6.573218 | -3.160790 | 1.559706  |
| H  | -6.337005 | -4.070344 | 1.001057  |
| H  | -7.667449 | -3.085878 | 1.580438  |
| H  | -6.234432 | -3.290017 | 2.593205  |
| C  | -6.572900 | -0.678670 | 1.606908  |
| H  | -7.570371 | -0.455416 | 1.209966  |
| H  | -5.957395 | 0.213533  | 1.496293  |
| H  | -6.717536 | -0.848330 | 2.677064  |
| C  | -1.890697 | -0.799425 | 3.031490  |
| H  | -1.119663 | -1.400097 | 2.541140  |
| H  | -1.539985 | -0.610504 | 4.053545  |
| H  | -1.953609 | 0.171921  | 2.537078  |
| C  | -3.058720 | -2.839289 | 3.839481  |
| H  | -2.200917 | -3.408960 | 3.474586  |
| H  | -3.955480 | -3.465300 | 3.813091  |
| H  | -2.849624 | -2.625312 | 4.895331  |
| C  | -4.265195 | -0.687456 | 3.832807  |
| H  | -5.167663 | -1.265264 | 4.053863  |
| H  | -4.553949 | 0.223864  | 3.312611  |
| H  | -3.851015 | -0.382115 | 4.801760  |
| C  | -2.709146 | -1.136886 | -2.265075 |
| H  | -2.148163 | -2.073155 | -2.226216 |
| H  | -2.217240 | -0.527102 | -3.025361 |
| H  | -3.719372 | -1.359661 | -2.615291 |
| Si | 3.111676  | 0.353562  | -0.817025 |
| Si | 3.799225  | 1.989270  | 1.069645  |
| Si | 3.685110  | -2.102817 | -1.091349 |
| C  | 3.217309  | -3.229561 | 0.581522  |
| C  | 5.699441  | -2.381099 | -1.606143 |
| C  | 2.481795  | -2.770942 | -2.734396 |

|   |          |           |           |
|---|----------|-----------|-----------|
| C | 1.815799 | -2.870894 | 1.105250  |
| H | 1.034494 | -3.228789 | 0.437059  |
| H | 1.677330 | -1.800055 | 1.206891  |
| H | 1.626309 | -3.327760 | 2.083561  |
| C | 4.253448 | -2.963469 | 1.692770  |
| H | 5.218358 | -3.423548 | 1.462003  |
| H | 3.926659 | -3.390118 | 2.648345  |
| H | 4.419108 | -1.896375 | 1.845898  |
| C | 3.209141 | -4.745725 | 0.282337  |
| H | 4.152139 | -5.102667 | -0.132251 |
| H | 2.414537 | -5.021311 | -0.415540 |
| H | 3.028826 | -5.316450 | 1.201807  |
| C | 6.604825 | -1.630532 | -0.615739 |
| H | 7.658638 | -1.701831 | -0.909795 |
| H | 6.532260 | -2.024209 | 0.399732  |
| H | 6.344714 | -0.578773 | -0.586631 |
| C | 5.989803 | -1.846883 | -3.024283 |
| H | 7.057930 | -1.933430 | -3.258944 |
| H | 5.728705 | -0.793326 | -3.130459 |
| H | 5.458766 | -2.409441 | -3.794081 |
| C | 6.099425 | -3.871200 | -1.553485 |
| H | 7.122180 | -4.009066 | -1.925584 |
| H | 5.451311 | -4.505264 | -2.159856 |
| H | 6.091332 | -4.255976 | -0.530173 |
| C | 2.479064 | -1.725447 | -3.869771 |
| H | 3.485373 | -1.478918 | -4.212653 |
| H | 1.979043 | -0.800629 | -3.569179 |
| H | 1.930682 | -2.105642 | -4.740458 |
| C | 1.025327 | -2.971247 | -2.272936 |
| H | 0.369008 | -3.163854 | -3.130356 |
| H | 0.636865 | -2.089380 | -1.761009 |
| H | 0.924742 | -3.834161 | -1.611528 |
| C | 3.011518 | -4.107828 | -3.291625 |
| H | 3.984229 | -3.994222 | -3.774560 |
| H | 2.330010 | -4.501935 | -4.055409 |
| H | 3.104338 | -4.874506 | -2.520022 |
| C | 3.187701 | 3.926327  | 0.390984  |
| C | 2.791726 | 1.579125  | 2.862942  |
| C | 5.860391 | 2.051452  | 1.407745  |
| C | 6.660221 | 2.175879  | 0.095268  |

|    |           |           |           |
|----|-----------|-----------|-----------|
| H  | 7.738095  | 2.122158  | 0.291800  |
| H  | 6.486809  | 3.124201  | -0.415061 |
| H  | 6.428821  | 1.386264  | -0.609546 |
| C  | 6.258716  | 3.264492  | 2.281272  |
| H  | 7.331392  | 3.235197  | 2.510071  |
| H  | 5.735365  | 3.293929  | 3.236281  |
| H  | 6.074862  | 4.213717  | 1.772971  |
| C  | 6.290726  | 0.766084  | 2.144882  |
| H  | 7.382833  | 0.676065  | 2.176260  |
| H  | 5.897690  | -0.128995 | 1.661841  |
| H  | 5.948030  | 0.763389  | 3.183464  |
| C  | 4.199561  | 4.499788  | -0.621890 |
| H  | 5.129689  | 4.804886  | -0.136546 |
| H  | 3.795416  | 5.399214  | -1.102412 |
| H  | 4.446863  | 3.794190  | -1.415328 |
| C  | 1.813214  | 3.814957  | -0.295786 |
| H  | 1.878656  | 3.264998  | -1.237679 |
| H  | 1.417211  | 4.808132  | -0.539071 |
| H  | 1.077291  | 3.318763  | 0.338692  |
| C  | 3.081817  | 4.915607  | 1.570355  |
| H  | 4.008453  | 4.977468  | 2.144916  |
| H  | 2.274811  | 4.658734  | 2.257604  |
| H  | 2.863931  | 5.926283  | 1.203665  |
| C  | 2.935081  | 0.090645  | 3.219625  |
| H  | 3.972432  | -0.197412 | 3.400388  |
| H  | 2.547530  | -0.531330 | 2.421854  |
| H  | 2.372718  | -0.154873 | 4.128320  |
| C  | 3.359038  | 2.388521  | 4.047096  |
| H  | 4.365722  | 2.057977  | 4.316847  |
| H  | 2.739439  | 2.247227  | 4.941424  |
| H  | 3.392760  | 3.460849  | 3.849363  |
| C  | 1.292606  | 1.905940  | 2.725096  |
| H  | 0.869471  | 1.453676  | 1.832665  |
| H  | 1.101789  | 2.979165  | 2.672139  |
| H  | 0.726114  | 1.531346  | 3.585978  |
| C  | 3.996793  | 1.138759  | -2.297242 |
| H  | 5.072338  | 1.217908  | -2.153679 |
| H  | 3.593934  | 2.135846  | -2.486065 |
| H  | 3.824009  | 0.568115  | -3.209975 |
| Sb | -0.257996 | -0.181023 | 0.212623  |



B 1.211619 0.588239 -1.256639

---

---

B-Sb(SiMe(SitBu3)2)2

---

---

| Atomic<br>Number | Coordinates (Angstroms) |           |           |
|------------------|-------------------------|-----------|-----------|
|                  | X                       | Y         | Z         |
| Si               | 2.309662                | -0.048144 | 0.405984  |
| Si               | 3.221258                | 2.373442  | 0.998566  |
| Si               | 3.882901                | -1.844120 | -0.861312 |
| C                | 2.087491                | 3.002816  | 2.706354  |
| C                | 2.878106                | 3.691370  | -0.569000 |
| C                | 5.217253                | 2.378711  | 1.567736  |
| C                | 3.573057                | 5.050238  | -0.327888 |
| H                | 4.661201                | 4.960996  | -0.321619 |
| H                | 3.275728                | 5.514593  | 0.613462  |
| H                | 3.321234                | 5.758810  | -1.126562 |
| C                | 1.372298                | 3.938027  | -0.729993 |
| H                | 0.826736                | 2.995444  | -0.819758 |
| H                | 1.160737                | 4.526109  | -1.631378 |
| H                | 0.967294                | 4.507094  | 0.108481  |
| C                | 3.385303                | 3.131964  | -1.909060 |
| H                | 2.901545                | 2.181782  | -2.155129 |
| H                | 4.469753                | 3.003310  | -1.907042 |
| H                | 3.160010                | 3.822354  | -2.731582 |
| C                | 2.221556                | 4.524407  | 2.929619  |
| H                | 3.258499                | 4.850149  | 3.017232  |
| H                | 1.713229                | 4.821338  | 3.855258  |
| H                | 1.754626                | 5.097289  | 2.124813  |
| C                | 0.602023                | 2.688971  | 2.486117  |
| H                | 0.014954                | 2.929633  | 3.380557  |
| H                | 0.435596                | 1.638154  | 2.261277  |
| H                | 0.183124                | 3.275869  | 1.672032  |
| C                | 2.555444                | 2.270025  | 3.981452  |
| H                | 2.557505                | 1.187083  | 3.866131  |
| H                | 1.890736                | 2.500470  | 4.823180  |
| H                | 3.554958                | 2.573328  | 4.293887  |
| C                | 5.579631                | 3.618326  | 2.417487  |
| H                | 6.658971                | 3.647469  | 2.613008  |

|   |          |           |           |
|---|----------|-----------|-----------|
| H | 5.095578 | 3.616562  | 3.394206  |
| H | 5.319780 | 4.553198  | 1.913000  |
| C | 6.133622 | 2.434276  | 0.331273  |
| H | 5.833296 | 1.719288  | -0.423206 |
| H | 7.175034 | 2.222171  | 0.600310  |
| H | 6.128810 | 3.418525  | -0.144115 |
| C | 5.522657 | 1.113723  | 2.395976  |
| H | 5.230354 | 0.205899  | 1.869192  |
| H | 4.997924 | 1.110178  | 3.354547  |
| H | 6.593376 | 1.038713  | 2.618420  |
| C | 2.696804 | -2.751368 | -2.363991 |
| C | 5.566738 | -1.047345 | -1.818858 |
| C | 4.538340 | -3.341977 | 0.484544  |
| C | 3.360699 | -4.239171 | 0.903566  |
| H | 3.657224 | -4.926047 | 1.705288  |
| H | 3.004715 | -4.860345 | 0.078403  |
| H | 2.524171 | -3.652313 | 1.272350  |
| C | 5.163215 | -2.715610 | 1.747237  |
| H | 5.536429 | -3.497191 | 2.420538  |
| H | 4.441455 | -2.135664 | 2.317569  |
| H | 6.011609 | -2.069309 | 1.516538  |
| C | 5.609577 | -4.246766 | -0.167132 |
| H | 5.864786 | -5.079753 | 0.499810  |
| H | 6.541200 | -3.712044 | -0.358893 |
| H | 5.275464 | -4.685921 | -1.107848 |
| C | 6.686891 | -0.775899 | -0.795728 |
| H | 7.186148 | -1.694534 | -0.478210 |
| H | 6.312541 | -0.291155 | 0.100770  |
| H | 7.466781 | -0.135811 | -1.224748 |
| C | 6.155108 | -1.995857 | -2.886352 |
| H | 6.387033 | -2.985135 | -2.487571 |
| H | 7.090146 | -1.585470 | -3.288166 |
| H | 5.488568 | -2.123469 | -3.741364 |
| C | 5.164452 | 0.251070  | -2.528978 |
| H | 6.041366 | 0.822100  | -2.853728 |
| H | 4.582007 | 0.866919  | -1.855349 |
| H | 4.553620 | 0.077449  | -3.417795 |
| C | 1.320365 | -3.124764 | -1.802857 |
| H | 1.386104 | -3.854911 | -0.995190 |
| H | 0.697334 | -3.572208 | -2.586338 |

|    |           |           |           |
|----|-----------|-----------|-----------|
| H  | 0.788442  | -2.257485 | -1.425529 |
| C  | 3.332507  | -4.050950 | -2.901135 |
| H  | 3.343788  | -4.840583 | -2.145524 |
| H  | 4.353171  | -3.914533 | -3.256580 |
| H  | 2.751099  | -4.438828 | -3.746835 |
| C  | 2.516901  | -1.758463 | -3.531163 |
| H  | 3.410680  | -1.699347 | -4.156627 |
| H  | 2.293181  | -0.748882 | -3.177986 |
| H  | 1.702007  | -2.074405 | -4.193026 |
| C  | 2.095024  | -0.788218 | 2.101920  |
| H  | 1.825104  | -1.840855 | 2.055749  |
| H  | 1.299722  | -0.284650 | 2.651352  |
| H  | 3.001845  | -0.694277 | 2.700433  |
| Si | -2.384689 | 0.117234  | 0.481999  |
| Si | -3.986748 | 1.819956  | -0.866974 |
| Si | -3.140243 | -2.362116 | 1.039120  |
| C  | -3.368055 | -3.464014 | -0.704349 |
| C  | -4.859735 | -2.477402 | 2.235928  |
| C  | -1.564303 | -3.212262 | 2.190442  |
| C  | -2.202869 | -3.189858 | -1.673980 |
| H  | -1.285513 | -3.665664 | -1.330370 |
| H  | -1.994641 | -2.127925 | -1.792120 |
| H  | -2.410634 | -3.600815 | -2.668945 |
| C  | -4.687978 | -3.085729 | -1.398379 |
| H  | -5.557806 | -3.416019 | -0.824931 |
| H  | -4.766524 | -3.557958 | -2.384818 |
| H  | -4.759740 | -2.010756 | -1.544414 |
| C  | -3.401345 | -4.984280 | -0.427768 |
| H  | -4.190274 | -5.267515 | 0.270401  |
| H  | -2.455659 | -5.353325 | -0.025356 |
| H  | -3.582265 | -5.538987 | -1.356817 |
| C  | -5.999426 | -1.672818 | 1.610986  |
| H  | -6.855715 | -1.586576 | 2.289936  |
| H  | -6.373888 | -2.121691 | 0.689322  |
| H  | -5.648547 | -0.676728 | 1.389349  |
| C  | -4.580917 | -1.899534 | 3.639423  |
| H  | -5.506045 | -1.834853 | 4.225206  |
| H  | -4.159947 | -0.892531 | 3.591118  |
| H  | -3.900732 | -2.530209 | 4.214862  |
| C  | -5.377613 | -3.925301 | 2.376302  |

|   |           |           |           |
|---|-----------|-----------|-----------|
| H | -6.227299 | -3.962622 | 3.069480  |
| H | -4.629460 | -4.617247 | 2.758988  |
| H | -5.740120 | -4.317731 | 1.421906  |
| C | -1.068949 | -2.211238 | 3.249171  |
| H | -1.865383 | -1.838579 | 3.894088  |
| H | -0.593340 | -1.355984 | 2.773755  |
| H | -0.314280 | -2.671138 | 3.898519  |
| C | -0.386692 | -3.559031 | 1.271913  |
| H | 0.463450  | -3.900274 | 1.870418  |
| H | -0.066857 | -2.692068 | 0.691925  |
| H | -0.619496 | -4.374819 | 0.586261  |
| C | -2.010659 | -4.502198 | 2.906251  |
| H | -2.718120 | -4.298399 | 3.712751  |
| H | -1.151884 | -4.999772 | 3.373849  |
| H | -2.463140 | -5.223892 | 2.223028  |
| C | -3.342460 | 3.788132  | -0.379237 |
| C | -3.696289 | 1.528374  | -2.912290 |
| C | -5.984162 | 1.704012  | -0.346799 |
| C | -6.156231 | 1.754197  | 1.191101  |
| H | -7.097992 | 1.284730  | 1.497899  |
| H | -6.201270 | 2.780494  | 1.566662  |
| H | -5.339811 | 1.274337  | 1.730575  |
| C | -6.815404 | 2.878727  | -0.918067 |
| H | -7.883029 | 2.722944  | -0.717840 |
| H | -6.706707 | 2.991617  | -1.997518 |
| H | -6.553458 | 3.832421  | -0.453905 |
| C | -6.581299 | 0.412302  | -0.940167 |
| H | -7.569473 | 0.198404  | -0.517513 |
| H | -5.941235 | -0.446344 | -0.759132 |
| H | -6.712054 | 0.485433  | -2.024214 |
| C | -3.834989 | 4.178658  | 1.030065  |
| H | -4.903230 | 4.408370  | 1.030323  |
| H | -3.330019 | 5.086613  | 1.381230  |
| H | -3.656852 | 3.398996  | 1.772048  |
| C | -1.812405 | 3.849324  | -0.413210 |
| H | -1.363334 | 3.061510  | 0.186925  |
| H | -1.454006 | 4.810472  | -0.026630 |
| H | -1.421823 | 3.756351  | -1.427994 |
| C | -3.880730 | 4.825313  | -1.389801 |
| H | -4.966976 | 4.806645  | -1.479349 |

|    |           |           |           |
|----|-----------|-----------|-----------|
| H  | -3.466362 | 4.682772  | -2.389619 |
| H  | -3.602118 | 5.839894  | -1.079269 |
| C  | -3.744716 | 0.027135  | -3.241753 |
| H  | -4.723445 | -0.402867 | -3.017787 |
| H  | -2.986480 | -0.521845 | -2.686878 |
| H  | -3.557368 | -0.148742 | -4.307747 |
| C  | -4.788383 | 2.228578  | -3.748521 |
| H  | -5.770128 | 1.771119  | -3.601592 |
| H  | -4.564109 | 2.147620  | -4.819264 |
| H  | -4.872885 | 3.292910  | -3.518063 |
| C  | -2.326716 | 2.087812  | -3.346434 |
| H  | -1.534914 | 1.811415  | -2.650443 |
| H  | -2.334808 | 3.178020  | -3.419647 |
| H  | -2.046237 | 1.717092  | -4.339420 |
| C  | -2.292351 | 0.953020  | 2.142742  |
| H  | -3.264661 | 0.955359  | 2.640080  |
| H  | -1.984728 | 1.993049  | 2.043211  |
| H  | -1.582695 | 0.480546  | 2.820102  |
| B  | -0.114312 | -0.169656 | -2.933333 |
| Sb | -0.052412 | 0.112189  | -0.722308 |

-----  
 -----  
 (SiiPrDis2)2B-Sb  
 -----

| Atomic<br>Number | Coordinates (Angstroms) |           |           |
|------------------|-------------------------|-----------|-----------|
|                  | X                       | Y         | Z         |
| B                | -0.089711               | 0.097666  | -0.598911 |
| Si               | 2.022083                | 0.309746  | -0.375938 |
| C                | 2.817637                | 0.996211  | -2.141049 |
| H                | 3.246196                | 1.925985  | -1.775093 |
| C                | 1.844058                | 1.409370  | -3.239729 |
| H                | 0.969970                | 1.927439  | -2.846240 |
| H                | 1.511897                | 0.562454  | -3.840455 |
| H                | 2.338706                | 2.097837  | -3.935564 |
| C                | 4.032612                | 0.280841  | -2.724215 |
| H                | 4.625918                | 0.985981  | -3.319556 |
| H                | 3.764515                | -0.526738 | -3.405310 |
| H                | 4.688876                | -0.113942 | -1.951256 |
| C                | 2.523998                | -1.509522 | 0.021640  |

|    |           |           |           |
|----|-----------|-----------|-----------|
| H  | 1.570355  | -1.867669 | 0.418679  |
| C  | 2.396224  | 1.886074  | 0.821083  |
| H  | 1.857206  | 1.719034  | 1.752488  |
| Si | 3.739572  | -1.937257 | 1.390868  |
| Si | 2.775177  | -2.766397 | -1.426981 |
| Si | 1.708160  | 3.589851  | 0.066253  |
| Si | 4.242446  | 2.286199  | 1.273695  |
| C  | 3.218865  | -1.308985 | 3.088774  |
| H  | 2.922772  | -0.265373 | 3.059478  |
| H  | 4.038473  | -1.420846 | 3.805013  |
| H  | 2.373269  | -1.890847 | 3.466316  |
| C  | 3.749343  | -3.843106 | 1.799760  |
| H  | 4.259322  | -3.989063 | 2.757097  |
| H  | 4.298290  | -4.398873 | 1.038120  |
| H  | 2.725186  | -4.211391 | 1.890322  |
| C  | 5.544922  | -1.579026 | 1.040708  |
| H  | 5.902725  | -0.686601 | 1.551927  |
| H  | 6.167081  | -2.408992 | 1.391817  |
| H  | 5.740074  | -1.457911 | -0.025636 |
| C  | 4.578578  | -3.130361 | -1.901686 |
| H  | 5.121032  | -2.233928 | -2.200729 |
| H  | 4.593418  | -3.823450 | -2.749233 |
| H  | 5.118894  | -3.610873 | -1.082716 |
| C  | 2.081489  | -4.502745 | -0.900107 |
| H  | 1.314423  | -4.384087 | -0.136667 |
| H  | 2.883992  | -5.140936 | -0.526057 |
| H  | 1.639408  | -4.994583 | -1.771607 |
| C  | 1.861960  | -2.511898 | -3.047578 |
| H  | 2.320413  | -3.130483 | -3.826680 |
| H  | 0.824183  | -2.838102 | -2.965405 |
| H  | 1.884470  | -1.488036 | -3.400428 |
| C  | 2.728178  | 4.394223  | -1.305637 |
| H  | 3.792404  | 4.162006  | -1.253493 |
| H  | 2.619735  | 5.482353  | -1.253234 |
| H  | 2.364291  | 4.082927  | -2.288449 |
| C  | 1.555388  | 4.869970  | 1.500050  |
| H  | 2.321531  | 5.643394  | 1.408572  |
| H  | 1.645677  | 4.371836  | 2.468846  |
| H  | 0.579289  | 5.361931  | 1.453430  |
| C  | -0.031160 | 3.510950  | -0.593647 |

|    |           |           |           |
|----|-----------|-----------|-----------|
| H  | -0.173047 | 4.221091  | -1.413962 |
| H  | -0.750382 | 3.766286  | 0.184654  |
| H  | -0.247787 | 2.519066  | -0.963136 |
| C  | 5.536671  | 1.824951  | 0.010095  |
| H  | 5.412099  | 2.390062  | -0.917086 |
| H  | 5.514084  | 0.767237  | -0.227766 |
| H  | 6.536600  | 2.049393  | 0.395407  |
| C  | 4.672096  | 4.156447  | 1.630650  |
| H  | 4.094046  | 4.515311  | 2.485008  |
| H  | 4.522330  | 4.795722  | 0.761442  |
| H  | 5.732730  | 4.210182  | 1.898457  |
| C  | 4.702981  | 1.630925  | 3.002560  |
| H  | 5.044922  | 0.601357  | 2.982475  |
| H  | 3.851927  | 1.728743  | 3.682226  |
| H  | 5.526537  | 2.223962  | 3.413716  |
| Sb | -0.629140 | -0.543654 | -2.679677 |
| Si | -1.685541 | 0.153314  | 0.711744  |
| C  | -1.026267 | 0.764742  | 2.580196  |
| H  | -1.845334 | 0.446476  | 3.218502  |
| C  | -0.910184 | 2.275276  | 2.787665  |
| H  | -1.852505 | 2.803833  | 2.638823  |
| H  | -0.174859 | 2.707348  | 2.122106  |
| H  | -0.599480 | 2.500566  | 3.814623  |
| C  | 0.233180  | 0.074906  | 3.074190  |
| H  | 0.834939  | 0.726340  | 3.717162  |
| H  | 0.846691  | -0.257788 | 2.246448  |
| H  | 0.004227  | -0.798930 | 3.685942  |
| C  | -2.992645 | 1.606269  | 0.282182  |
| H  | -2.476902 | 2.472360  | 0.696594  |
| C  | -2.628082 | -1.585936 | 0.917339  |
| H  | -3.621226 | -1.294597 | 1.261865  |
| Si | -4.612034 | 1.495530  | 1.388572  |
| Si | -3.486359 | 2.222859  | -1.422615 |
| Si | -2.050539 | -2.755446 | 2.310635  |
| Si | -2.933774 | -2.568292 | -0.662601 |
| C  | -5.879110 | 0.241955  | 0.768969  |
| H  | -5.438613 | -0.475372 | 0.077000  |
| H  | -6.707718 | 0.743934  | 0.261729  |
| H  | -6.299860 | -0.317285 | 1.610399  |
| C  | -4.353852 | 1.118238  | 3.218784  |

|   |           |           |           |
|---|-----------|-----------|-----------|
| H | -5.309639 | 1.203176  | 3.746663  |
| H | -3.662442 | 1.821655  | 3.686383  |
| H | -4.002201 | 0.099216  | 3.361561  |
| C | -5.482057 | 3.198871  | 1.460650  |
| H | -6.022756 | 3.407408  | 0.535630  |
| H | -6.209155 | 3.202652  | 2.278518  |
| H | -4.748741 | 3.988347  | 1.646613  |
| C | -5.203954 | 1.743177  | -2.076587 |
| H | -5.355004 | 0.664427  | -2.069479 |
| H | -5.304350 | 2.085890  | -3.111686 |
| H | -6.001088 | 2.219540  | -1.501841 |
| C | -3.605649 | 4.182698  | -1.275315 |
| H | -4.551427 | 4.469032  | -0.815141 |
| H | -3.561267 | 4.615245  | -2.278525 |
| H | -2.774235 | 4.560394  | -0.678296 |
| C | -2.371054 | 2.045881  | -2.918064 |
| H | -2.577400 | 1.119260  | -3.456450 |
| H | -2.577319 | 2.854150  | -3.628428 |
| H | -1.314994 | 2.106158  | -2.676940 |
| C | -2.532605 | -2.157100 | 4.051147  |
| H | -2.033394 | -1.244351 | 4.364769  |
| H | -2.271643 | -2.931273 | 4.780411  |
| H | -3.614409 | -2.006314 | 4.103441  |
| C | -0.256191 | -3.253023 | 2.269978  |
| H | 0.053143  | -3.666878 | 3.234717  |
| H | 0.390177  | -2.413661 | 2.045780  |
| H | -0.089092 | -4.024342 | 1.516425  |
| C | -2.959657 | -4.461537 | 2.342311  |
| H | -2.714725 | -4.972146 | 3.279231  |
| H | -2.616653 | -5.096318 | 1.523163  |
| H | -4.041813 | -4.319092 | 2.304697  |
| C | -4.374919 | -3.833696 | -0.435311 |
| H | -5.092337 | -3.456410 | 0.298093  |
| H | -4.001112 | -4.812716 | -0.133546 |
| H | -4.893786 | -3.965919 | -1.389995 |
| C | -3.639212 | -1.602800 | -2.107589 |
| H | -3.206423 | -0.615994 | -2.184678 |
| H | -4.721190 | -1.491440 | -1.998653 |
| H | -3.459593 | -2.132461 | -3.048268 |
| C | -1.436926 | -3.546527 | -1.205408 |



|   |           |           |           |
|---|-----------|-----------|-----------|
| H | -1.352218 | -4.484796 | -0.649816 |
| H | -0.528487 | -2.970158 | -1.029992 |
| H | -1.493754 | -3.795792 | -2.268919 |

-----  
 -----  
 (SiiPrDis2)-B-Sb-(SiiPrDis2)  
 -----

| Atomic<br>Number | Coordinates (Angstroms) |           |           |
|------------------|-------------------------|-----------|-----------|
|                  | X                       | Y         | Z         |
| Sb               | 0.473708                | -0.776943 | -0.752151 |
| Si               | 2.721460                | -0.155537 | 0.418277  |
| C                | 2.309129                | -0.752013 | 2.220361  |
| H                | 1.833845                | -1.723068 | 2.043181  |
| C                | 1.205550                | 0.068604  | 2.908631  |
| H                | 0.334875                | 0.189547  | 2.262236  |
| H                | 1.517638                | 1.072956  | 3.184744  |
| H                | 0.866318                | -0.432960 | 3.821989  |
| C                | 3.461923                | -1.043812 | 3.171041  |
| H                | 3.904962                | -2.014180 | 2.933096  |
| H                | 3.118991                | -1.113009 | 4.209172  |
| H                | 4.254810                | -0.299997 | 3.125624  |
| C                | 2.746449                | 1.720146  | 0.227548  |
| H                | 1.673662                | 1.928938  | 0.349564  |
| C                | 4.035549                | -1.156936 | -0.500976 |
| H                | 4.111122                | -0.693883 | -1.489749 |
| Si               | 3.023027                | 2.296587  | -1.575089 |
| Si               | 3.495857                | 2.908587  | 1.461746  |
| Si               | 3.449566                | -2.943430 | -0.927082 |
| Si               | 5.791046                | -1.173635 | 0.149029  |
| C                | 2.042719                | 1.307922  | -2.855111 |
| H                | 2.326251                | 0.255430  | -2.866816 |
| H                | 2.223036                | 1.713096  | -3.855751 |
| H                | 0.978532                | 1.405052  | -2.643511 |
| C                | 2.332513                | 4.062674  | -1.816320 |
| H                | 2.357537                | 4.321594  | -2.879216 |
| H                | 2.914757                | 4.808497  | -1.273543 |
| H                | 1.293858                | 4.104228  | -1.475803 |
| C                | 4.799507                | 2.275735  | -2.179207 |
| H                | 5.210813                | 1.264675  | -2.176213 |

|    |           |           |           |
|----|-----------|-----------|-----------|
| H  | 4.839974  | 2.638384  | -3.211673 |
| H  | 5.453013  | 2.917521  | -1.587912 |
| C  | 4.948339  | 3.983966  | 0.881739  |
| H  | 5.832608  | 3.377494  | 0.679293  |
| H  | 5.211577  | 4.688764  | 1.677608  |
| H  | 4.708308  | 4.574900  | -0.002831 |
| C  | 2.077315  | 4.180202  | 1.866950  |
| H  | 1.226817  | 3.644645  | 2.297260  |
| H  | 1.761115  | 4.696514  | 0.958735  |
| H  | 2.446756  | 4.913846  | 2.588551  |
| C  | 4.049745  | 2.366545  | 3.177925  |
| H  | 4.968228  | 1.782757  | 3.152818  |
| H  | 4.274677  | 3.261630  | 3.769464  |
| H  | 3.295670  | 1.816982  | 3.735360  |
| C  | 4.846400  | -4.117631 | -1.497181 |
| H  | 5.575349  | -4.300305 | -0.705314 |
| H  | 5.346740  | -3.711840 | -2.380180 |
| H  | 4.410418  | -5.082976 | -1.774146 |
| C  | 2.319948  | -2.927129 | -2.465110 |
| H  | 2.469632  | -3.846214 | -3.040417 |
| H  | 2.561674  | -2.079802 | -3.110927 |
| H  | 1.265716  | -2.889537 | -2.187228 |
| C  | 2.567138  | -3.852432 | 0.457408  |
| H  | 3.125198  | -3.793429 | 1.394887  |
| H  | 2.459418  | -4.911210 | 0.200842  |
| H  | 1.562044  | -3.456284 | 0.617285  |
| C  | 6.442306  | 0.477954  | 0.757881  |
| H  | 7.522363  | 0.419261  | 0.926643  |
| H  | 5.983890  | 0.743356  | 1.704944  |
| H  | 6.265374  | 1.262629  | 0.024429  |
| C  | 6.201533  | -2.426216 | 1.488308  |
| H  | 7.226509  | -2.788392 | 1.358561  |
| H  | 5.539243  | -3.293612 | 1.478176  |
| H  | 6.148140  | -1.965833 | 2.478581  |
| C  | 6.977237  | -1.534906 | -1.329840 |
| H  | 6.553843  | -1.136095 | -2.255533 |
| H  | 7.153273  | -2.606544 | -1.436670 |
| H  | 7.942444  | -1.052878 | -1.148254 |
| B  | -1.236816 | 0.179280  | 0.285557  |
| Si | -2.995594 | -0.112277 | -0.511651 |

|    |           |           |           |
|----|-----------|-----------|-----------|
| C  | -2.742527 | -0.360731 | -2.534046 |
| H  | -3.694158 | -0.004257 | -2.936921 |
| C  | -2.576423 | -1.820272 | -2.992561 |
| H  | -3.497227 | -2.395386 | -2.863788 |
| H  | -1.769484 | -2.326714 | -2.452568 |
| H  | -2.342515 | -1.864522 | -4.062842 |
| C  | -1.594222 | 0.439065  | -3.147866 |
| H  | -1.787067 | 0.609797  | -4.213544 |
| H  | -0.653590 | -0.114003 | -3.097437 |
| H  | -1.437719 | 1.406396  | -2.682026 |
| C  | -3.754621 | -1.777441 | 0.026837  |
| H  | -3.455013 | -2.431810 | -0.790528 |
| C  | -4.028665 | 1.450623  | -0.091307 |
| H  | -5.087795 | 1.197176  | -0.160542 |
| Si | -5.637167 | -1.856168 | -0.131749 |
| Si | -3.056532 | -2.777762 | 1.434664  |
| Si | -3.783727 | 2.934011  | -1.265612 |
| Si | -3.720025 | 2.061248  | 1.706559  |
| C  | -6.608637 | -1.023349 | 1.238726  |
| H  | -6.432240 | 0.052920  | 1.268642  |
| H  | -6.370573 | -1.438741 | 2.219634  |
| H  | -7.680863 | -1.171602 | 1.073793  |
| C  | -6.253316 | -1.131358 | -1.777918 |
| H  | -7.327070 | -1.316979 | -1.879963 |
| H  | -5.746132 | -1.605008 | -2.622000 |
| H  | -6.095659 | -0.053130 | -1.826393 |
| C  | -6.225771 | -3.669574 | -0.207787 |
| H  | -6.095791 | -4.170049 | 0.754136  |
| H  | -7.288848 | -3.700172 | -0.465081 |
| H  | -5.668527 | -4.213662 | -0.975583 |
| C  | -4.115324 | -2.967506 | 2.979044  |
| H  | -4.277391 | -2.015877 | 3.485200  |
| H  | -3.609637 | -3.630656 | 3.688797  |
| H  | -5.086046 | -3.415670 | 2.755539  |
| C  | -2.843090 | -4.589824 | 0.766777  |
| H  | -3.814234 | -5.026857 | 0.529032  |
| H  | -2.355977 | -5.199575 | 1.532841  |
| H  | -2.219290 | -4.573890 | -0.131149 |
| C  | -1.324478 | -2.367055 | 2.020824  |
| H  | -1.276086 | -1.377475 | 2.470657  |

|   |           |           |           |
|---|-----------|-----------|-----------|
| H | -1.005089 | -3.085923 | 2.782411  |
| H | -0.611981 | -2.429843 | 1.198461  |
| C | -4.432613 | 2.577699  | -3.013735 |
| H | -3.664610 | 2.140319  | -3.651824 |
| H | -4.747682 | 3.511732  | -3.489706 |
| H | -5.297681 | 1.911089  | -2.976136 |
| C | -2.023615 | 3.588880  | -1.366652 |
| H | -1.766404 | 3.835549  | -2.401363 |
| H | -1.292911 | 2.866493  | -0.994554 |
| H | -1.916310 | 4.504646  | -0.777922 |
| C | -4.870394 | 4.428764  | -0.756639 |
| H | -4.955545 | 5.122154  | -1.598964 |
| H | -4.414132 | 4.973085  | 0.072932  |
| H | -5.873821 | 4.094427  | -0.480603 |
| C | -5.205048 | 3.123265  | 2.278140  |
| H | -6.128271 | 2.761609  | 1.817173  |
| H | -5.060612 | 4.175600  | 2.028845  |
| H | -5.310726 | 3.053421  | 3.365087  |
| C | -3.685535 | 0.699686  | 3.001358  |
| H | -2.796279 | 0.082693  | 2.899462  |
| H | -4.582455 | 0.086044  | 2.930704  |
| H | -3.662335 | 1.136648  | 4.004907  |
| C | -2.149645 | 3.064737  | 1.962220  |
| H | -2.239437 | 4.063886  | 1.528904  |
| H | -1.278058 | 2.568824  | 1.527909  |
| H | -1.959835 | 3.191925  | 3.032874  |

-----  
-----  
B-Sb(SiiPrDis2)2  
-----

| Atomic<br>Number | Coordinates (Angstroms) |           |           |
|------------------|-------------------------|-----------|-----------|
|                  | X                       | Y         | Z         |
| Sb               | 0.125717                | -0.088964 | -1.148116 |
| Si               | -2.436159               | -0.205271 | -0.516977 |
| C                | -3.405634               | -0.723911 | -2.173198 |
| H                | -3.779190               | -1.714424 | -1.915009 |
| C                | -2.524317               | -0.940670 | -3.406530 |
| H                | -1.727525               | -1.661381 | -3.215123 |
| H                | -2.056512               | -0.020020 | -3.752913 |

|    |           |           |           |
|----|-----------|-----------|-----------|
| H  | -3.120102 | -1.337537 | -4.236519 |
| C  | -4.655588 | 0.070730  | -2.542521 |
| H  | -5.328017 | -0.552683 | -3.144240 |
| H  | -4.426053 | 0.942315  | -3.156339 |
| H  | -5.215614 | 0.400525  | -1.666719 |
| C  | -2.691948 | 1.591775  | 0.063280  |
| H  | -1.708891 | 1.801573  | 0.499248  |
| C  | -2.673845 | -1.754740 | 0.682099  |
| H  | -2.095125 | -1.566489 | 1.589754  |
| Si | -3.849151 | 2.008152  | 1.463441  |
| Si | -2.801851 | 2.936770  | -1.296723 |
| Si | -1.892840 | -3.398639 | -0.101590 |
| Si | -4.460754 | -2.278340 | 1.213659  |
| C  | -3.263017 | 1.216421  | 3.078266  |
| H  | -2.921479 | 0.193927  | 2.933831  |
| H  | -4.063478 | 1.227060  | 3.823548  |
| H  | -2.424523 | 1.789316  | 3.486091  |
| C  | -3.810119 | 3.860309  | 2.003087  |
| H  | -4.472458 | 3.987602  | 2.865236  |
| H  | -4.157927 | 4.523464  | 1.209806  |
| H  | -2.797802 | 4.138612  | 2.307488  |
| C  | -5.656807 | 1.692890  | 1.107017  |
| H  | -5.818191 | 0.728723  | 0.630838  |
| H  | -6.240103 | 1.720504  | 2.032723  |
| H  | -6.071969 | 2.458995  | 0.447571  |
| C  | -4.555938 | 3.529547  | -1.701540 |
| H  | -5.249735 | 2.700714  | -1.844072 |
| H  | -4.538134 | 4.115079  | -2.626359 |
| H  | -4.948829 | 4.177276  | -0.914380 |
| C  | -1.860335 | 4.518792  | -0.733467 |
| H  | -1.856203 | 4.634974  | 0.348336  |
| H  | -2.327696 | 5.399732  | -1.183022 |
| H  | -0.826242 | 4.467907  | -1.080733 |
| C  | -1.977435 | 2.588897  | -2.950352 |
| H  | -1.725747 | 3.534448  | -3.442594 |
| H  | -1.051550 | 2.036623  | -2.818473 |
| H  | -2.634119 | 2.051258  | -3.633071 |
| C  | -2.967547 | -4.327135 | -1.348445 |
| H  | -3.984070 | -4.511055 | -1.002117 |
| H  | -2.513547 | -5.301900 | -1.556032 |

|    |           |           |           |
|----|-----------|-----------|-----------|
| H  | -3.020253 | -3.788206 | -2.297617 |
| C  | -1.465125 | -4.587605 | 1.349716  |
| H  | -2.167527 | -5.423318 | 1.386086  |
| H  | -1.481137 | -4.049062 | 2.300853  |
| H  | -0.461685 | -4.999353 | 1.205050  |
| C  | -0.249616 | -3.241506 | -0.970144 |
| H  | -0.357846 | -2.719259 | -1.918382 |
| H  | 0.145073  | -4.235826 | -1.203522 |
| H  | 0.480171  | -2.742502 | -0.337399 |
| C  | -5.803980 | -2.199186 | -0.092322 |
| H  | -5.544395 | -2.769782 | -0.986343 |
| H  | -6.030907 | -1.176527 | -0.385980 |
| H  | -6.729268 | -2.628204 | 0.306641  |
| C  | -4.592219 | -4.106889 | 1.893277  |
| H  | -3.890361 | -4.243256 | 2.719298  |
| H  | -4.426672 | -4.850460 | 1.114595  |
| H  | -5.606518 | -4.253465 | 2.278569  |
| C  | -5.094680 | -1.431125 | 2.792097  |
| H  | -5.421377 | -0.413121 | 2.617525  |
| H  | -4.329890 | -1.454038 | 3.572510  |
| H  | -5.966225 | -1.975470 | 3.171189  |
| B  | 0.580437  | 0.254240  | -3.305304 |
| Si | 2.126816  | -0.034712 | 0.538631  |
| C  | 1.305930  | -0.374404 | 2.391907  |
| H  | 2.065489  | -0.029665 | 3.091970  |
| C  | 1.035865  | -1.855369 | 2.697974  |
| H  | 1.958926  | -2.430596 | 2.801650  |
| H  | 0.427919  | -2.319619 | 1.921551  |
| H  | 0.504086  | -1.966463 | 3.649973  |
| C  | 0.015443  | 0.394355  | 2.637512  |
| H  | -0.365876 | 0.197132  | 3.645623  |
| H  | -0.747246 | 0.095862  | 1.927254  |
| H  | 0.130664  | 1.469592  | 2.556164  |
| C  | 3.292640  | -1.589823 | 0.338256  |
| H  | 2.721344  | -2.359590 | 0.860113  |
| C  | 3.083636  | 1.634829  | 0.466887  |
| H  | 4.096100  | 1.414754  | 0.810547  |
| Si | 4.903110  | -1.445376 | 1.390931  |
| Si | 3.657374  | -2.466446 | -1.276638 |
| Si | 2.528407  | 3.035919  | 1.626798  |

|    |          |           |           |
|----|----------|-----------|-----------|
| Si | 3.290814 | 2.337040  | -1.288486 |
| C  | 6.248579 | -0.398801 | 0.587033  |
| H  | 5.843612 | 0.281239  | -0.164038 |
| H  | 6.998203 | -1.032371 | 0.104730  |
| H  | 6.763755 | 0.201311  | 1.343427  |
| C  | 4.652699 | -0.766525 | 3.134942  |
| H  | 5.595104 | -0.818755 | 3.689681  |
| H  | 3.912162 | -1.349546 | 3.686975  |
| H  | 4.350533 | 0.278161  | 3.105680  |
| C  | 5.638932 | -3.174983 | 1.728430  |
| H  | 6.079973 | -3.606737 | 0.828148  |
| H  | 6.427163 | -3.096292 | 2.483403  |
| H  | 4.862310 | -3.844717 | 2.108428  |
| C  | 5.408810 | -2.333818 | -1.984583 |
| H  | 5.712787 | -1.297355 | -2.133123 |
| H  | 5.444190 | -2.832024 | -2.959042 |
| H  | 6.142494 | -2.828432 | -1.344425 |
| C  | 3.471938 | -4.377091 | -0.871045 |
| H  | 4.256797 | -4.696359 | -0.184745 |
| H  | 3.556625 | -4.946389 | -1.800636 |
| H  | 2.493767 | -4.556029 | -0.418942 |
| C  | 2.525601 | -2.277587 | -2.754014 |
| H  | 2.968950 | -1.639818 | -3.522656 |
| H  | 2.345771 | -3.249895 | -3.224295 |
| H  | 1.562881 | -1.872274 | -2.476401 |
| C  | 2.727268 | 2.659413  | 3.474975  |
| H  | 2.002908 | 1.939652  | 3.850647  |
| H  | 2.578147 | 3.581885  | 4.046334  |
| H  | 3.737809 | 2.303949  | 3.687304  |
| C  | 0.790299 | 3.653820  | 1.311804  |
| H  | 0.267841 | 3.859390  | 2.250864  |
| H  | 0.213793 | 2.920371  | 0.748208  |
| H  | 0.810934 | 4.585017  | 0.739189  |
| C  | 3.650008 | 4.591564  | 1.482715  |
| H  | 3.488848 | 5.234914  | 2.353307  |
| H  | 3.392979 | 5.171017  | 0.593751  |
| H  | 4.703212 | 4.301063  | 1.458524  |
| C  | 4.819999 | 3.495862  | -1.357810 |
| H  | 5.577284 | 3.164328  | -0.642275 |
| H  | 4.543259 | 4.530911  | -1.152438 |

|   |          |          |           |
|---|----------|----------|-----------|
| H | 5.255974 | 3.465602 | -2.361177 |
| C | 3.747283 | 1.081269 | -2.598625 |
| H | 2.967696 | 0.337248 | -2.694672 |
| H | 4.694306 | 0.600724 | -2.356189 |
| H | 3.862246 | 1.566935 | -3.572770 |
| C | 1.817794 | 3.303018 | -1.925515 |
| H | 1.769238 | 4.298273 | -1.475913 |
| H | 0.886539 | 2.778690 | -1.709184 |
| H | 1.886238 | 3.436287 | -3.009565 |

-----  
 -----  
 (NHC)2B-Sb  
 -----

| Atomic<br>Number | Coordinates (Angstroms) |           |           |
|------------------|-------------------------|-----------|-----------|
|                  | X                       | Y         | Z         |
| B                | -0.564268               | -2.244309 | 1.892144  |
| Sb               | 0.832518                | -2.562027 | 0.309828  |
| C                | -2.202106               | -2.230125 | 1.734386  |
| N                | -2.703262               | -2.108247 | 0.305690  |
| C                | -3.831487               | -1.267489 | 0.251452  |
| C                | -4.018759               | -0.683921 | 1.452097  |
| N                | -3.015657               | -1.104770 | 2.373858  |
| H                | -4.400679               | -1.156713 | -0.657619 |
| H                | -4.800825               | -0.008801 | 1.758448  |
| C                | -3.332316               | -1.027305 | 3.780052  |
| C                | -3.959688               | -0.789143 | 6.524816  |
| C                | -4.205371               | -1.972978 | 4.397695  |
| C                | -2.878252               | 0.109957  | 4.516859  |
| C                | -3.193831               | 0.196473  | 5.888859  |
| C                | -4.477049               | -1.849778 | 5.776975  |
| H                | -2.852172               | 1.046777  | 6.468965  |
| H                | -5.126602               | -2.573506 | 6.263144  |
| H                | -4.181508               | -0.708030 | 7.585843  |
| C                | -2.338313               | -2.964956 | -0.767418 |
| C                | -1.519622               | -4.732093 | -2.824059 |
| C                | -1.561051               | -2.460402 | -1.864184 |
| C                | -2.813775               | -4.315234 | -0.794599 |
| C                | -2.376612               | -5.182338 | -1.811308 |
| C                | -1.149001               | -3.386492 | -2.860385 |



|   |           |           |           |
|---|-----------|-----------|-----------|
| H | -2.720462 | -6.213641 | -1.823623 |
| H | -0.540340 | -3.028381 | -3.687964 |
| H | -1.178435 | -5.416286 | -3.596343 |
| C | -3.875097 | -4.827549 | 0.184113  |
| H | -4.163952 | -4.006832 | 0.844786  |
| C | -5.161441 | -5.255127 | -0.568630 |
| H | -4.985526 | -6.128960 | -1.208941 |
| H | -5.541749 | -4.443566 | -1.201080 |
| H | -5.945855 | -5.523920 | 0.151472  |
| C | -3.349147 | -5.984346 | 1.060351  |
| H | -3.004239 | -6.827329 | 0.448012  |
| H | -4.137797 | -6.354236 | 1.726265  |
| H | -2.509768 | -5.657110 | 1.680085  |
| C | -1.245466 | -0.985217 | -2.207197 |
| H | -0.227614 | -1.006381 | -2.624113 |
| C | -2.190959 | -0.514074 | -3.348148 |
| H | -3.234237 | -0.501441 | -3.006684 |
| H | -2.129012 | -1.160483 | -4.230893 |
| H | -1.922744 | 0.506577  | -3.650806 |
| C | -1.244846 | 0.097046  | -1.109636 |
| H | -0.733632 | -0.229292 | -0.204237 |
| H | -2.254982 | 0.411606  | -0.831479 |
| H | -0.712429 | 0.976415  | -1.496850 |
| C | -2.146408 | 1.272506  | 3.834744  |
| H | -1.499498 | 0.851290  | 3.054933  |
| C | -3.151238 | 2.237221  | 3.148134  |
| H | -3.864963 | 2.635047  | 3.882869  |
| H | -3.714149 | 1.754064  | 2.346941  |
| H | -2.611411 | 3.087323  | 2.709627  |
| C | -1.278535 | 2.107775  | 4.798590  |
| H | -0.627217 | 1.481026  | 5.412345  |
| H | -1.898153 | 2.721318  | 5.466772  |
| H | -0.644054 | 2.792515  | 4.226188  |
| C | -4.974390 | -3.045697 | 3.618199  |
| H | -4.679609 | -3.001397 | 2.568493  |
| C | -4.691606 | -4.475144 | 4.129212  |
| H | -3.628110 | -4.721757 | 4.051578  |
| H | -5.256314 | -5.208005 | 3.539138  |
| H | -4.991803 | -4.596088 | 5.178129  |
| C | -6.496504 | -2.749545 | 3.655560  |

|   |           |           |          |
|---|-----------|-----------|----------|
| H | -7.037592 | -3.465517 | 3.022657 |
| H | -6.712217 | -1.738474 | 3.289841 |
| H | -6.897617 | -2.832576 | 4.673758 |
| C | 0.153862  | -2.244862 | 3.438729 |
| N | 0.711393  | -3.619888 | 3.793255 |
| C | 2.106999  | -3.573176 | 3.673836 |
| C | 2.523632  | -2.290019 | 3.491799 |
| N | 1.413960  | -1.406862 | 3.501299 |
| H | -0.569277 | -1.901867 | 4.193314 |
| H | 2.710276  | -4.459572 | 3.800300 |
| H | 3.534543  | -1.911779 | 3.480900 |
| C | 1.599090  | -0.097005 | 4.085029 |
| C | 2.389136  | 2.395980  | 5.152215 |
| C | 1.769347  | 0.051847  | 5.490960 |
| C | 1.805069  | 1.017548  | 3.217012 |
| C | 2.209254  | 2.246997  | 3.772341 |
| C | 2.157692  | 1.309092  | 6.000489 |
| H | 2.395143  | 3.094077  | 3.119196 |
| H | 2.295607  | 1.433830  | 7.070888 |
| H | 2.704233  | 3.352144  | 5.560825 |
| C | -0.007968 | -4.856843 | 3.906440 |
| C | -1.400503 | -7.307601 | 4.190608 |
| C | 0.158949  | -5.894837 | 2.932367 |
| C | -0.805922 | -5.099214 | 5.066482 |
| C | -1.510674 | -6.314389 | 5.170993 |
| C | -0.549316 | -7.103044 | 3.102310 |
| H | -2.125934 | -6.506133 | 6.043988 |
| H | -0.437577 | -7.890609 | 2.362254 |
| H | -1.950213 | -8.239637 | 4.289664 |
| C | 1.574461  | -1.096542 | 6.481983 |
| H | 1.254808  | -1.987228 | 5.935906 |
| C | 2.902113  | -1.451604 | 7.195291 |
| H | 3.684477  | -1.697811 | 6.467484 |
| H | 2.762948  | -2.318445 | 7.853575 |
| H | 3.262886  | -0.616559 | 7.809370 |
| C | 0.468581  | -0.761388 | 7.513601 |
| H | 0.733946  | 0.114732  | 8.118926 |
| H | 0.316277  | -1.603193 | 8.200464 |
| H | -0.485183 | -0.550419 | 7.015841 |
| C | 1.667300  | 0.899331  | 1.701194 |

|   |           |           |           |
|---|-----------|-----------|-----------|
| H | 1.016931  | 0.047054  | 1.492533  |
| C | 3.036865  | 0.604938  | 1.042169  |
| H | 3.485238  | -0.311324 | 1.444200  |
| H | 3.739681  | 1.431978  | 1.210017  |
| H | 2.916433  | 0.468250  | -0.040240 |
| C | 1.012581  | 2.133780  | 1.041725  |
| H | 0.041938  | 2.362098  | 1.499608  |
| H | 0.844292  | 1.934359  | -0.023023 |
| H | 1.644764  | 3.028168  | 1.108446  |
| C | -0.762841 | -4.162441 | 6.277597  |
| H | -0.637714 | -3.132225 | 5.931821  |
| C | -2.031571 | -4.191649 | 7.156515  |
| H | -1.996398 | -3.368458 | 7.880721  |
| H | -2.111313 | -5.126378 | 7.726430  |
| H | -2.937650 | -4.071389 | 6.556900  |
| C | 0.471175  | -4.538228 | 7.141646  |
| H | 0.530541  | -3.898046 | 8.030811  |
| H | 1.405413  | -4.433616 | 6.578787  |
| H | 0.394283  | -5.580009 | 7.480100  |
| C | 1.116270  | -5.817034 | 1.736876  |
| H | 1.518031  | -4.804122 | 1.666087  |
| C | 2.316136  | -6.778799 | 1.916766  |
| H | 2.838211  | -6.604116 | 2.866191  |
| H | 3.034985  | -6.636581 | 1.099047  |
| H | 1.991980  | -7.827302 | 1.901942  |
| C | 0.408381  | -6.094764 | 0.393744  |
| H | -0.431855 | -5.411387 | 0.252645  |
| H | 0.032907  | -7.123925 | 0.324891  |
| H | 1.104871  | -5.929090 | -0.438186 |
| H | -2.536757 | -3.199872 | 2.169787  |

-----  
 -----  
 NHC-B-Sb-NHC  
 -----

| Atomic<br>Number | Coordinates (Angstroms) |           |          |
|------------------|-------------------------|-----------|----------|
|                  | X                       | Y         | Z        |
| B                | -0.611896               | -2.681482 | 3.511722 |
| Sb               | -1.244863               | -3.035360 | 1.609440 |
| C                | -2.847500               | -1.371494 | 1.188042 |

|   |           |           |           |
|---|-----------|-----------|-----------|
| N | -3.384461 | -1.447267 | -0.171441 |
| C | -4.759504 | -1.763680 | -0.109017 |
| C | -5.155481 | -1.779846 | 1.191294  |
| N | -4.047988 | -1.480450 | 2.015216  |
| H | -2.275976 | -0.451405 | 1.365499  |
| H | -5.341647 | -1.901970 | -1.004610 |
| H | -6.135160 | -1.938445 | 1.608905  |
| C | -4.009041 | -1.531819 | 3.446355  |
| C | -3.819477 | -1.603428 | 6.255552  |
| C | -4.206476 | -2.768801 | 4.133754  |
| C | -3.719164 | -0.339031 | 4.164191  |
| C | -3.610106 | -0.400859 | 5.568389  |
| C | -4.127584 | -2.769328 | 5.541715  |
| H | -3.380126 | 0.501760  | 6.128582  |
| H | -4.281113 | -3.698359 | 6.083834  |
| H | -3.744536 | -1.632318 | 7.340002  |
| C | -2.564552 | -1.505327 | -1.353190 |
| C | -0.878154 | -1.662940 | -3.616752 |
| C | -2.058240 | -0.307683 | -1.938721 |
| C | -2.260687 | -2.779245 | -1.933677 |
| C | -1.424928 | -2.828824 | -3.067717 |
| C | -1.200784 | -0.421875 | -3.056666 |
| H | -1.192910 | -3.788796 | -3.520586 |
| H | -0.796738 | 0.484933  | -3.502478 |
| H | -0.223158 | -1.718987 | -4.482795 |
| C | -2.839823 | -4.098684 | -1.405687 |
| H | -3.245387 | -3.928025 | -0.403915 |
| C | -4.006525 | -4.580290 | -2.305367 |
| H | -3.647757 | -4.811266 | -3.316825 |
| H | -4.790230 | -3.818623 | -2.391138 |
| H | -4.456525 | -5.490450 | -1.887508 |
| C | -1.775225 | -5.216552 | -1.285364 |
| H | -1.425932 | -5.560817 | -2.266852 |
| H | -2.202462 | -6.081057 | -0.761988 |
| H | -0.907564 | -4.874343 | -0.712374 |
| C | -2.364626 | 1.135276  | -1.498513 |
| H | -2.287565 | 1.724576  | -2.424909 |
| C | -3.780884 | 1.413840  | -0.949876 |
| H | -3.914665 | 1.054962  | 0.074155  |
| H | -4.551550 | 0.944842  | -1.573047 |

|   |           |           |           |
|---|-----------|-----------|-----------|
| H | -3.957943 | 2.498185  | -0.951724 |
| C | -1.273599 | 1.696573  | -0.548819 |
| H | -0.279770 | 1.626547  | -1.006839 |
| H | -1.236584 | 1.154798  | 0.402538  |
| H | -1.475340 | 2.753080  | -0.327510 |
| C | -3.564369 | 1.010875  | 3.462390  |
| H | -3.796841 | 0.872662  | 2.401113  |
| C | -4.579345 | 2.045486  | 4.008509  |
| H | -4.378250 | 2.292023  | 5.058906  |
| H | -5.604872 | 1.661254  | 3.942575  |
| H | -4.521325 | 2.976008  | 3.428993  |
| C | -2.115746 | 1.545573  | 3.571937  |
| H | -1.385553 | 0.818901  | 3.195618  |
| H | -1.852073 | 1.761138  | 4.615081  |
| H | -2.002036 | 2.474212  | 2.997771  |
| C | -4.519224 | -4.086021 | 3.414881  |
| H | -4.307183 | -3.957249 | 2.347897  |
| C | -3.642316 | -5.258944 | 3.914018  |
| H | -2.582775 | -4.995317 | 3.877913  |
| H | -3.796696 | -6.139977 | 3.276665  |
| H | -3.884366 | -5.550814 | 4.943349  |
| C | -6.019316 | -4.447364 | 3.565766  |
| H | -6.250015 | -5.359253 | 2.999507  |
| H | -6.670072 | -3.642152 | 3.203887  |
| H | -6.267602 | -4.631200 | 4.619373  |
| C | 0.583959  | -2.745856 | 4.544172  |
| N | 1.107656  | -4.154827 | 4.605701  |
| C | 2.495662  | -4.155507 | 4.303880  |
| C | 2.881411  | -2.913712 | 3.920465  |
| N | 1.773913  | -2.035445 | 3.956007  |
| H | 0.346241  | -2.363978 | 5.552081  |
| H | 3.079922  | -5.057303 | 4.388167  |
| H | 3.853441  | -2.566213 | 3.611655  |
| C | 1.769108  | -0.658883 | 3.576171  |
| C | 1.665663  | 2.066214  | 2.850852  |
| C | 1.624737  | 0.339795  | 4.581857  |
| C | 1.907279  | -0.287070 | 2.201731  |
| C | 1.864096  | 1.082978  | 1.870993  |
| C | 1.548312  | 1.692820  | 4.195530  |
| H | 1.972662  | 1.384650  | 0.832352  |

|   |           |           |           |
|---|-----------|-----------|-----------|
| H | 1.420704  | 2.461176  | 4.953811  |
| H | 1.616688  | 3.115247  | 2.569264  |
| C | 0.384874  | -5.262214 | 5.155809  |
| C | -1.114066 | -7.404149 | 6.214746  |
| C | 0.029821  | -6.361254 | 4.315159  |
| C | 0.044422  | -5.273417 | 6.539016  |
| C | -0.735986 | -6.336137 | 7.038737  |
| C | -0.707673 | -7.424858 | 4.873268  |
| H | -1.023574 | -6.343359 | 8.087252  |
| H | -0.982537 | -8.271198 | 4.249336  |
| H | -1.704079 | -8.223036 | 6.619053  |
| C | 1.606266  | -0.008942 | 6.072699  |
| H | 1.835142  | -1.074426 | 6.177777  |
| C | 2.711759  | 0.753420  | 6.844517  |
| H | 3.694818  | 0.586952  | 6.387096  |
| H | 2.753353  | 0.408054  | 7.886061  |
| H | 2.524344  | 1.834559  | 6.858664  |
| C | 0.216275  | 0.254478  | 6.705509  |
| H | -0.035717 | 1.322461  | 6.661736  |
| H | 0.207737  | -0.052315 | 7.759693  |
| H | -0.573790 | -0.296291 | 6.181980  |
| C | 2.146109  | -1.311570 | 1.087598  |
| H | 1.865279  | -2.298042 | 1.469335  |
| C | 3.644963  | -1.350624 | 0.693737  |
| H | 4.286004  | -1.558152 | 1.558083  |
| H | 3.956725  | -0.388549 | 0.265569  |
| H | 3.818509  | -2.130673 | -0.059408 |
| C | 1.294219  | -1.044617 | -0.174967 |
| H | 0.240929  | -0.907912 | 0.081775  |
| H | 1.355052  | -1.899666 | -0.860383 |
| H | 1.630898  | -0.154898 | -0.722627 |
| C | 0.551165  | -4.206908 | 7.514662  |
| H | 1.248603  | -3.553394 | 6.981037  |
| C | -0.607046 | -3.337517 | 8.064566  |
| H | -0.218288 | -2.545056 | 8.717925  |
| H | -1.307903 | -3.945819 | 8.651380  |
| H | -1.172626 | -2.867958 | 7.251570  |
| C | 1.355624  | -4.844987 | 8.675702  |
| H | 1.797488  | -4.061528 | 9.305627  |
| H | 2.167340  | -5.475189 | 8.291751  |

|   |           |           |          |
|---|-----------|-----------|----------|
| H | 0.718376  | -5.468291 | 9.315785 |
| C | 0.469132  | -6.445496 | 2.850319 |
| H | 0.811313  | -5.452491 | 2.540131 |
| C | 1.660464  | -7.428506 | 2.702339 |
| H | 2.497189  | -7.147856 | 3.353072 |
| H | 2.020871  | -7.438324 | 1.665141 |
| H | 1.357123  | -8.450407 | 2.966764 |
| C | -0.672509 | -6.861032 | 1.893119 |
| H | -1.514260 | -6.165483 | 1.961546 |
| H | -1.039783 | -7.874223 | 2.101889 |
| H | -0.309862 | -6.846574 | 0.857718 |

-----  
 -----  
 B-Sb(NHC)2  
 -----

| Atomic<br>Number | Coordinates (Angstroms) |           |           |
|------------------|-------------------------|-----------|-----------|
|                  | X                       | Y         | Z         |
| Sb               | -0.409181               | -1.821562 | 1.755761  |
| B                | 0.899759                | -2.422402 | -0.000254 |
| C                | -2.677983               | -2.196904 | 1.524423  |
| N                | -3.124674               | -2.071403 | 0.123251  |
| C                | -4.280066               | -1.255708 | 0.062714  |
| C                | -4.527505               | -0.745072 | 1.291970  |
| N                | -3.540739               | -1.211670 | 2.197001  |
| H                | -4.818446               | -1.122457 | -0.860749 |
| H                | -5.318836               | -0.092617 | 1.622516  |
| C                | -3.642106               | -1.074423 | 3.620652  |
| C                | -3.861014               | -0.778043 | 6.410916  |
| C                | -4.355687               | -2.043560 | 4.377127  |
| C                | -3.086141               | 0.079145  | 4.250995  |
| C                | -3.208056               | 0.202792  | 5.650774  |
| C                | -4.436148               | -1.885391 | 5.776171  |
| H                | -2.801114               | 1.076601  | 6.151684  |
| H                | -4.974930               | -2.619931 | 6.369435  |
| H                | -3.940105               | -0.667977 | 7.489779  |
| C                | -2.647407               | -2.892841 | -0.945820 |
| C                | -1.609619               | -4.603076 | -2.936948 |
| C                | -1.828595               | -2.342890 | -1.982198 |
| C                | -3.023328               | -4.268403 | -0.975412 |

|   |           |           |           |
|---|-----------|-----------|-----------|
| C | -2.480084 | -5.109444 | -1.964813 |
| C | -1.314053 | -3.235763 | -2.953281 |
| H | -2.750216 | -6.162224 | -1.984324 |
| H | -0.674022 | -2.840981 | -3.739658 |
| H | -1.186022 | -5.262640 | -3.690078 |
| C | -4.076900 | -4.844172 | -0.023519 |
| H | -4.429551 | -4.045342 | 0.636228  |
| C | -5.314849 | -5.334339 | -0.816843 |
| H | -5.066000 | -6.183496 | -1.465720 |
| H | -5.719949 | -4.534746 | -1.449313 |
| H | -6.104121 | -5.659493 | -0.126181 |
| C | -3.511896 | -5.976842 | 0.863229  |
| H | -3.135905 | -6.810226 | 0.256154  |
| H | -4.291785 | -6.369833 | 1.527432  |
| H | -2.685046 | -5.620736 | 1.485982  |
| C | -1.557526 | -0.852007 | -2.274129 |
| H | -0.611484 | -0.840392 | -2.834482 |
| C | -2.653561 | -0.310488 | -3.231647 |
| H | -3.633323 | -0.299993 | -2.738175 |
| H | -2.733901 | -0.918831 | -4.140135 |
| H | -2.415186 | 0.720467  | -3.524342 |
| C | -1.364865 | 0.139045  | -1.112000 |
| H | -0.636013 | -0.227963 | -0.389510 |
| H | -2.294497 | 0.355656  | -0.577155 |
| H | -0.972142 | 1.085205  | -1.510189 |
| C | -2.457415 | 1.213062  | 3.436491  |
| H | -2.095179 | 0.789661  | 2.492725  |
| C | -3.527005 | 2.285013  | 3.102071  |
| H | -3.917261 | 2.742958  | 4.021385  |
| H | -4.371578 | 1.858018  | 2.550609  |
| H | -3.086952 | 3.080567  | 2.486668  |
| C | -1.258351 | 1.881526  | 4.140918  |
| H | -0.535748 | 1.139275  | 4.490352  |
| H | -1.572737 | 2.486643  | 5.001911  |
| H | -0.739320 | 2.550693  | 3.444693  |
| C | -5.106138 | -3.201733 | 3.716616  |
| H | -4.972400 | -3.132902 | 2.632926  |
| C | -4.567994 | -4.576791 | 4.171083  |
| H | -3.500724 | -4.680347 | 3.948438  |
| H | -5.102473 | -5.385829 | 3.657557  |



|   |           |           |          |
|---|-----------|-----------|----------|
| H | -4.700622 | -4.722195 | 5.250867 |
| C | -6.628101 | -3.088728 | 3.980211 |
| H | -7.167225 | -3.870821 | 3.430133 |
| H | -7.012501 | -2.113812 | 3.656038 |
| H | -6.861490 | -3.205609 | 5.046111 |
| C | 0.567257  | -2.299115 | 3.814499 |
| N | 0.988108  | -3.682784 | 4.064043 |
| C | 2.398951  | -3.744694 | 4.089911 |
| C | 2.906873  | -2.492246 | 3.987377 |
| N | 1.840735  | -1.566605 | 3.867476 |
| H | -0.173147 | -1.920742 | 4.532412 |
| H | 2.911326  | -4.685304 | 4.212722 |
| H | 3.931105  | -2.158154 | 4.016568 |
| C | 1.974872  | -0.190194 | 4.268591 |
| C | 2.364262  | 2.469645  | 5.100496 |
| C | 1.879519  | 0.136525  | 5.650174 |
| C | 2.286161  | 0.808696  | 3.301488 |
| C | 2.474413  | 2.134387  | 3.745329 |
| C | 2.071276  | 1.476033  | 6.043247 |
| H | 2.715623  | 2.910304  | 3.023382 |
| H | 2.005871  | 1.740911  | 7.095252 |
| H | 2.515465  | 3.496928  | 5.422048 |
| C | 0.143916  | -4.840890 | 4.055669 |
| C | -1.399851 | -7.197567 | 4.128004 |
| C | 0.181127  | -5.742538 | 2.950036 |
| C | -0.655883 | -5.128206 | 5.201633 |
| C | -1.424550 | -6.308223 | 5.211386 |
| C | -0.599482 | -6.917020 | 3.015919 |
| H | -2.031120 | -6.550855 | 6.078430 |
| H | -0.578476 | -7.619125 | 2.186675 |
| H | -1.994370 | -8.107338 | 4.157059 |
| C | 1.621456  | -0.920646 | 6.726188 |
| H | 1.486337  | -1.893260 | 6.245146 |
| C | 2.843169  | -1.059642 | 7.667549 |
| H | 3.751174  | -1.291680 | 7.097752 |
| H | 2.677517  | -1.868398 | 8.391088 |
| H | 3.023768  | -0.134359 | 8.229290 |
| C | 0.333614  | -0.615904 | 7.528999 |
| H | 0.420866  | 0.326728  | 8.084101 |
| H | 0.139101  | -1.415172 | 8.256068 |

|   |           |           |           |
|---|-----------|-----------|-----------|
| H | -0.537264 | -0.536140 | 6.867344  |
| C | 2.471240  | 0.499900  | 1.815468  |
| H | 2.165580  | -0.534912 | 1.637606  |
| C | 3.959358  | 0.610457  | 1.406111  |
| H | 4.586717  | -0.051319 | 2.016138  |
| H | 4.330446  | 1.636758  | 1.526098  |
| H | 4.081378  | 0.323052  | 0.354150  |
| C | 1.588047  | 1.399336  | 0.918792  |
| H | 0.536975  | 1.339341  | 1.222108  |
| H | 1.653795  | 1.066913  | -0.124681 |
| H | 1.901256  | 2.450845  | 0.958986  |
| C | -0.591791 | -4.250854 | 6.455712  |
| H | -0.413517 | -3.215869 | 6.149095  |
| C | -1.889325 | -4.248879 | 7.293361  |
| H | -1.827677 | -3.472579 | 8.066648  |
| H | -2.047746 | -5.207226 | 7.804344  |
| H | -2.765013 | -4.035946 | 6.672620  |
| C | 0.605960  | -4.691393 | 7.336985  |
| H | 0.678135  | -4.058068 | 8.231100  |
| H | 1.552856  | -4.621621 | 6.790247  |
| H | 0.476924  | -5.731031 | 7.665772  |
| C | 1.077429  | -5.533842 | 1.723822  |
| H | 1.499505  | -4.524815 | 1.762583  |
| C | 2.255507  | -6.540170 | 1.729485  |
| H | 2.835141  | -6.480909 | 2.658634  |
| H | 2.930593  | -6.333033 | 0.889742  |
| H | 1.892135  | -7.571108 | 1.625997  |
| C | 0.297517  | -5.643069 | 0.394590  |
| H | -0.538062 | -4.939518 | 0.372700  |
| H | -0.100423 | -6.652369 | 0.227982  |
| H | 0.955093  | -5.394886 | -0.447297 |
| H | -2.813305 | -3.214993 | 1.932018  |

---



---
